# Supplementary material
Source: PubMed Central journal article supplement (PMC4626217)
Supplement: NIHMS698287-supplement.pdf [file NIHMS698287-supplement.pdf]

# Modular Synthesis and Biological Activity of Pyridyl-based Analogues of the Potent Class I Histone Deacetylase Inhibitor Largazole

Dane J. Clausen,<sup>a</sup> William B. Smith,<sup>b</sup> Brandon E. Haines,<sup>c</sup> Olaf Wiest,<sup>c</sup> James E. Bradner,<sup>b</sup> and Robert M. Williams<sup>a,d,\*</sup>

<sup>a</sup> Department of Chemistry, Colorado State University, Fort Collins, CO 80523, USA

<sup>b</sup> Department of Medical Oncology, Dana-Farber Cancer Institute, Boston, MA 02115, USA

<sup>c</sup> Department of Chemistry & Biochemistry, University of Notre Dame, Notre Dame, IN 46556, USA

<sup>d</sup> University of Colorado Cancer Center, Aurora, CO 80045, USA

## SUPPORTING INFORMATION

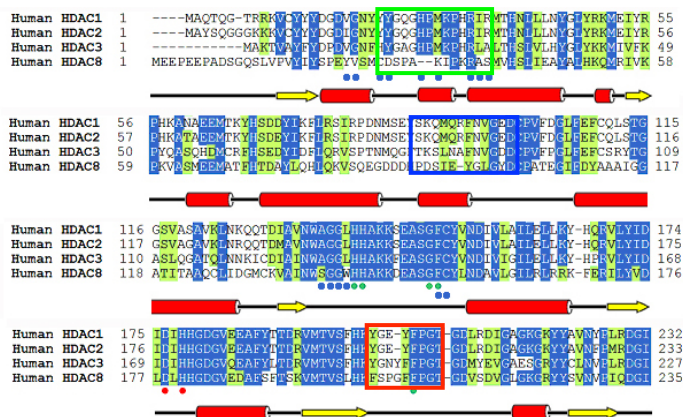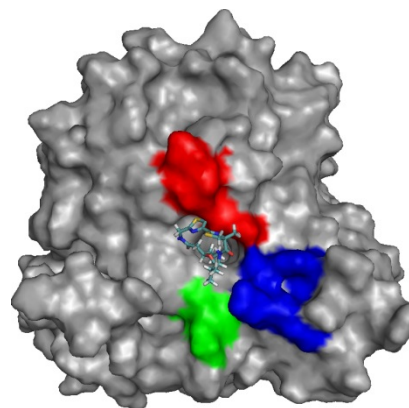

Figure S1: left: sequence alignment of human class I HDACs with residues in the non-conserved surface areas around the binding side highlights. Right: structure of HDAC1 homology model in surface representation with non-conserved residues color-coded

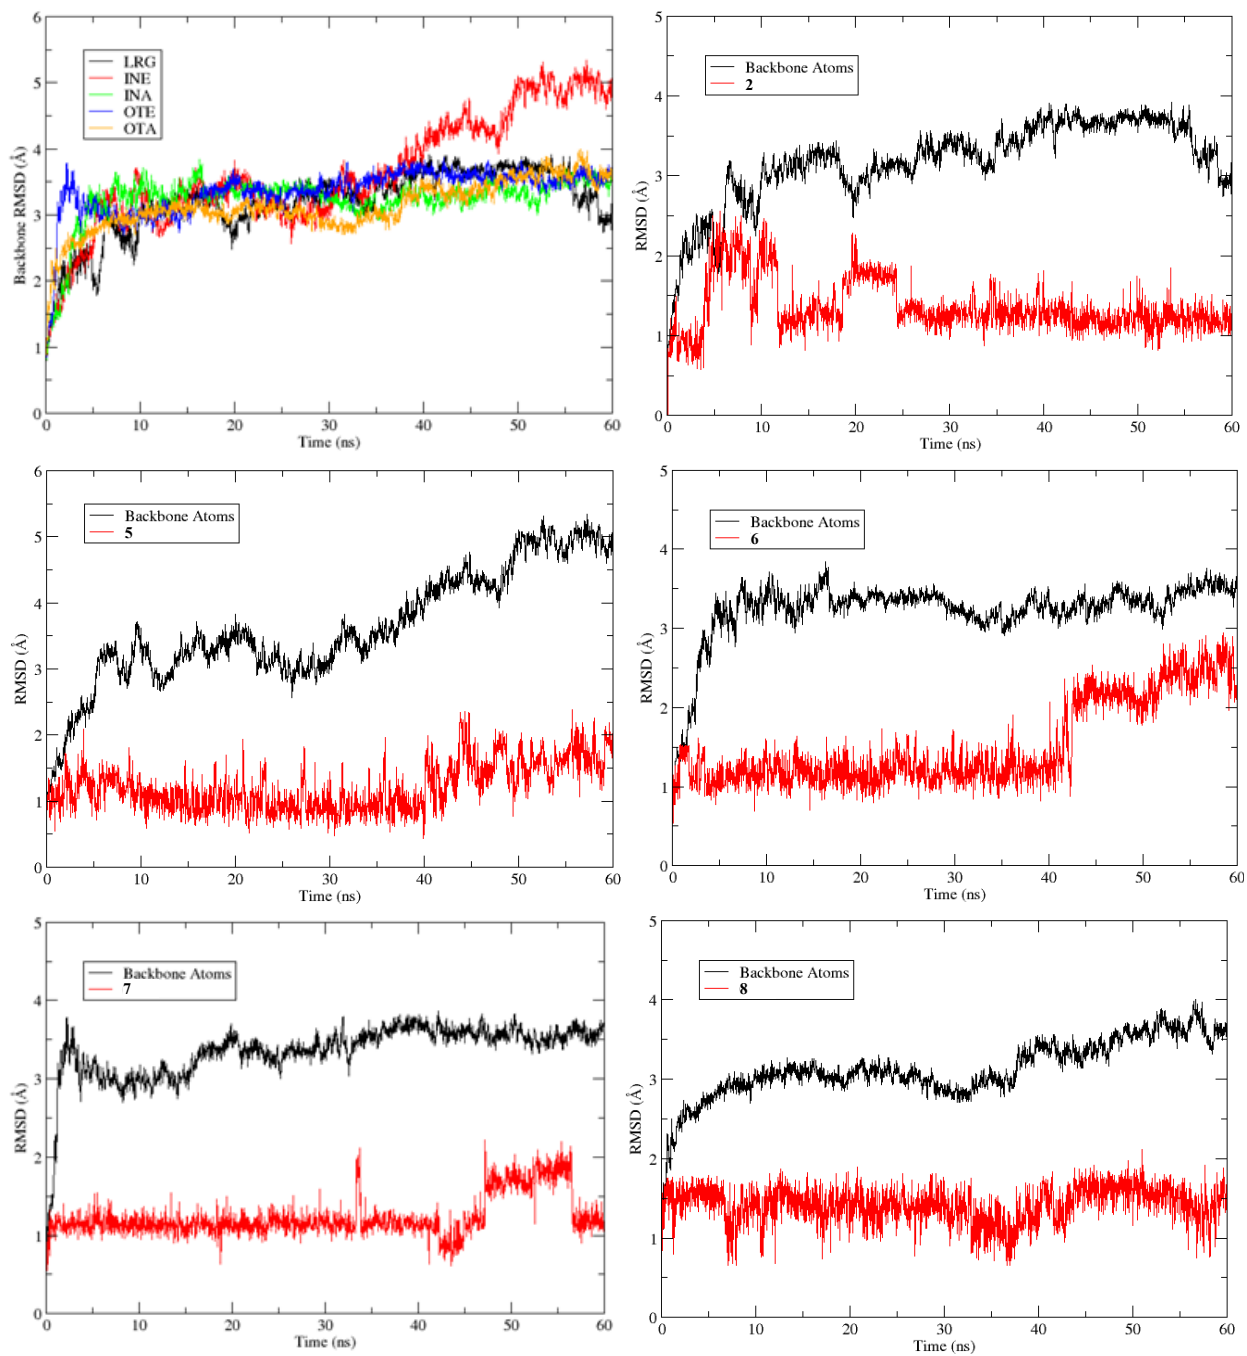

Figure S2: RMSD plots for 60 ns MD simulations of HDAC1: top left: overall backbone RMS and backbone RMSDs for protein (black) and all atoms in ligands for complexes of HDAC1 with **2** (top right), **6** (middle left), **8** (middle right), **10** (bottom left) and **12** (bottom right)

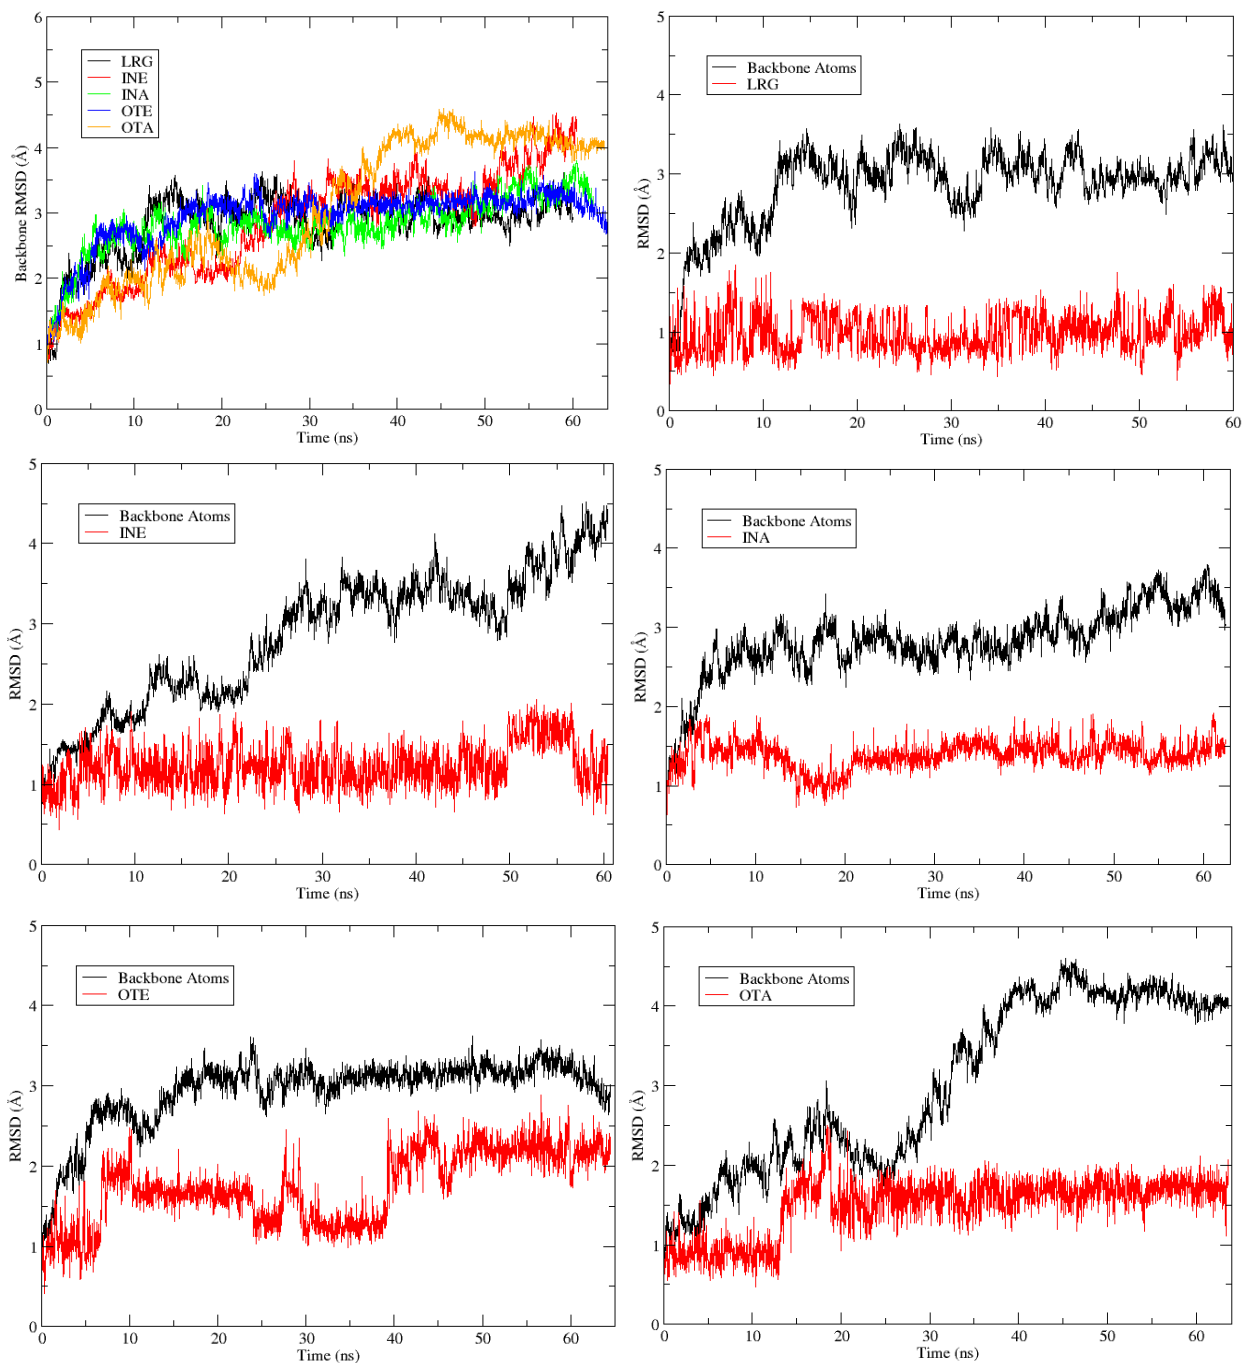

Figure S3: RMSD plots for 60 ns MD simulations of HDAC6: top left: overall backbone RMS and backbone RMS for protein (black) and all atoms in ligands for complexes of HDAC6 with **2** (top right), **6** (middle left), **8** (middle right), **10** (bottom left) and **12** (bottom right)

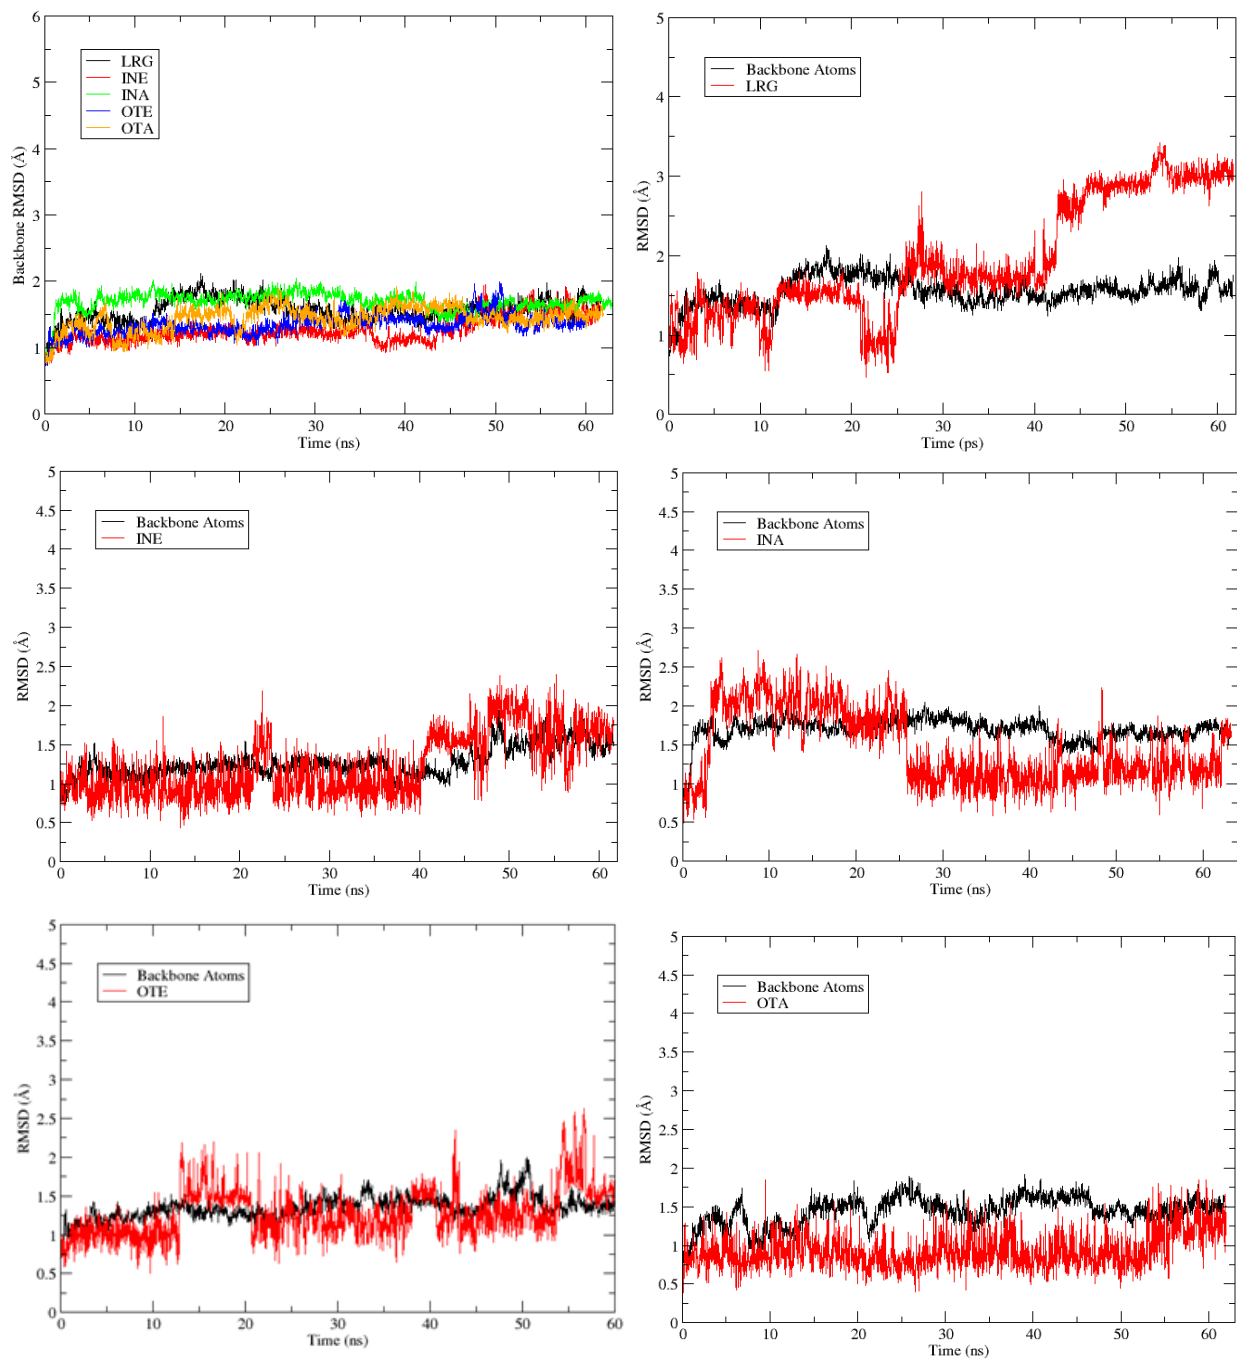

Figure S4: RMSD plots for 60 ns MD simulations of HDAC8: top left: overall backbone RMS and backbone RMS for protein (black) and all atoms in ligands for complexes of HDAC8 with **2** (top right), **6** (middle left), **8** (middle right), **10** (bottom left) and **12** (bottom right)

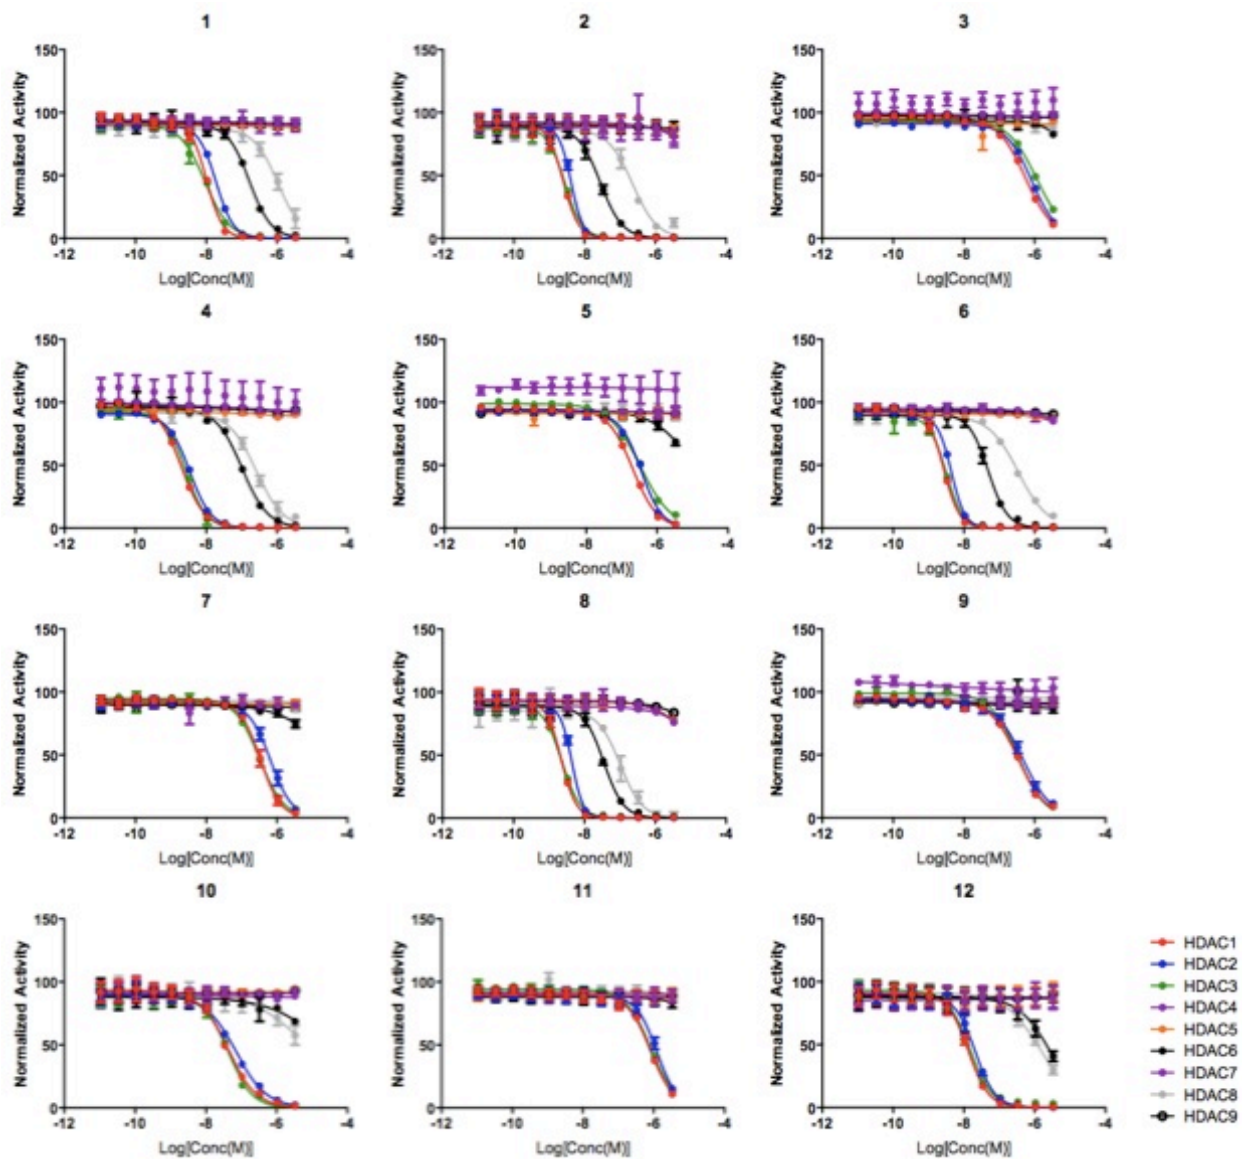

Figure S5. HDAC activity of largazole analogs

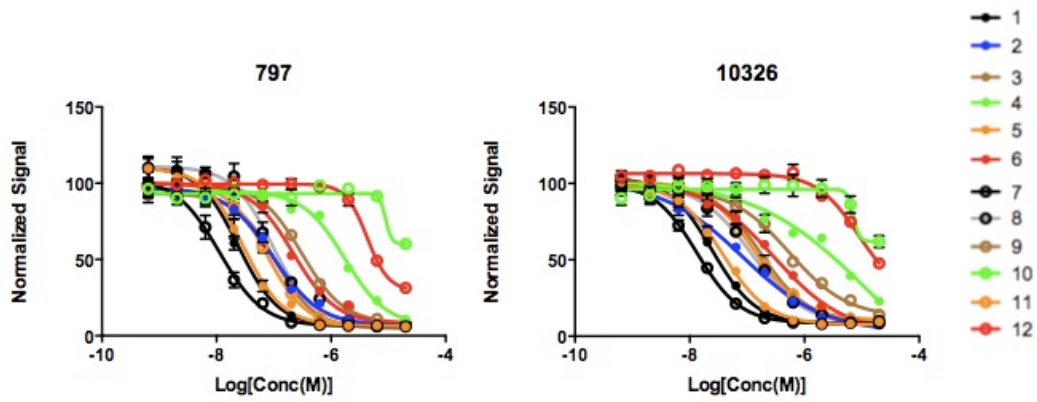

Figure S6. Activity of largazole analogs in 797 and 10326 cell lines

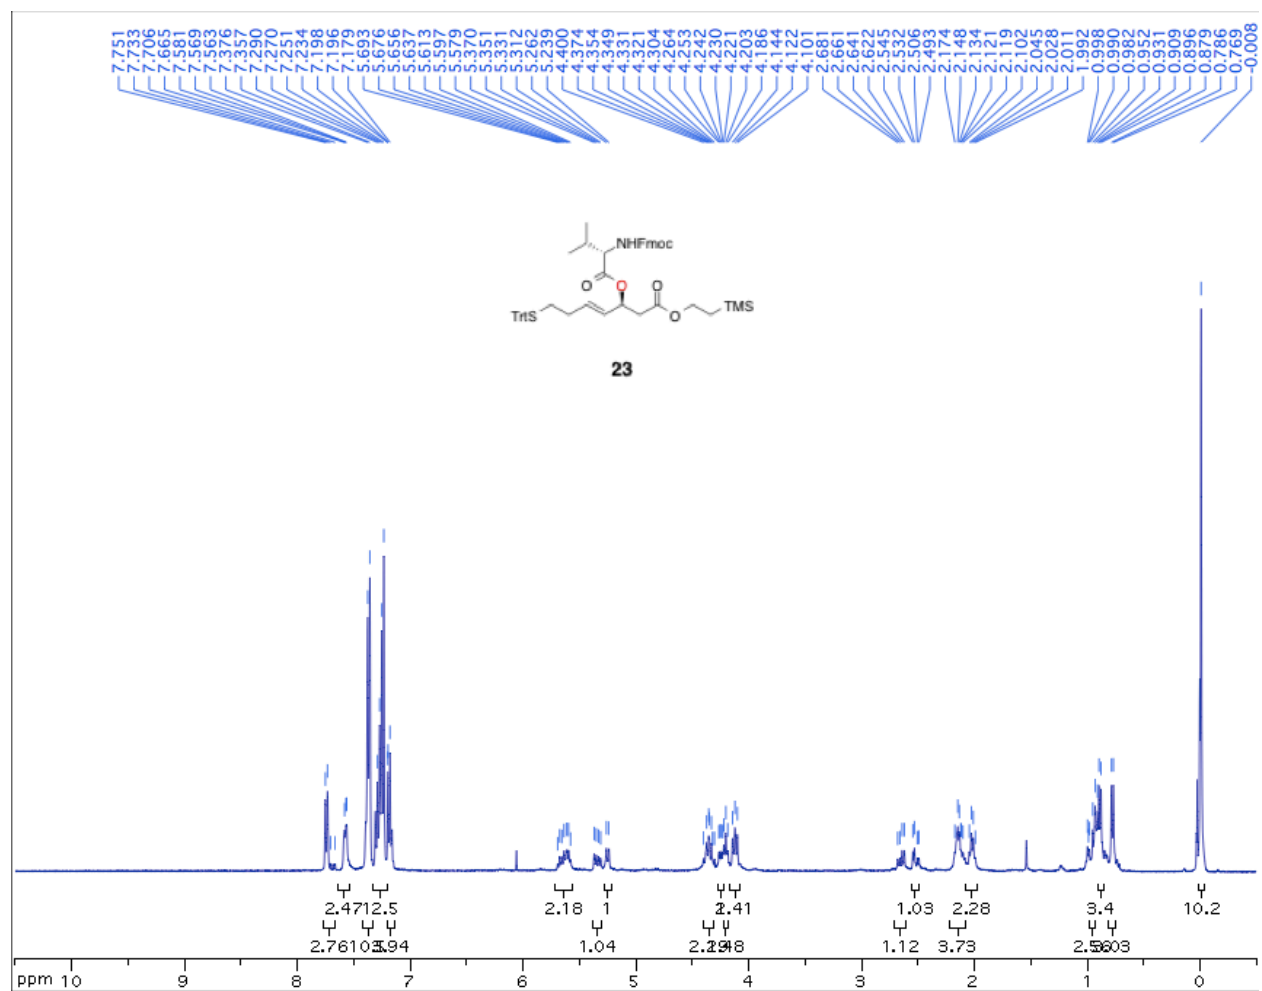

Figure S7. <sup>1</sup>H-NMR spectrum of (*S,E*)-2-(Trimethylsilyl)ethyl 3-(((*S*)-2-(((9*H*-fluoren-9-yl)methoxy)carbonyl)amino)-3-methylbutanoyl)oxy)-7-(tritylthio)hept-4-enoate (**23**).

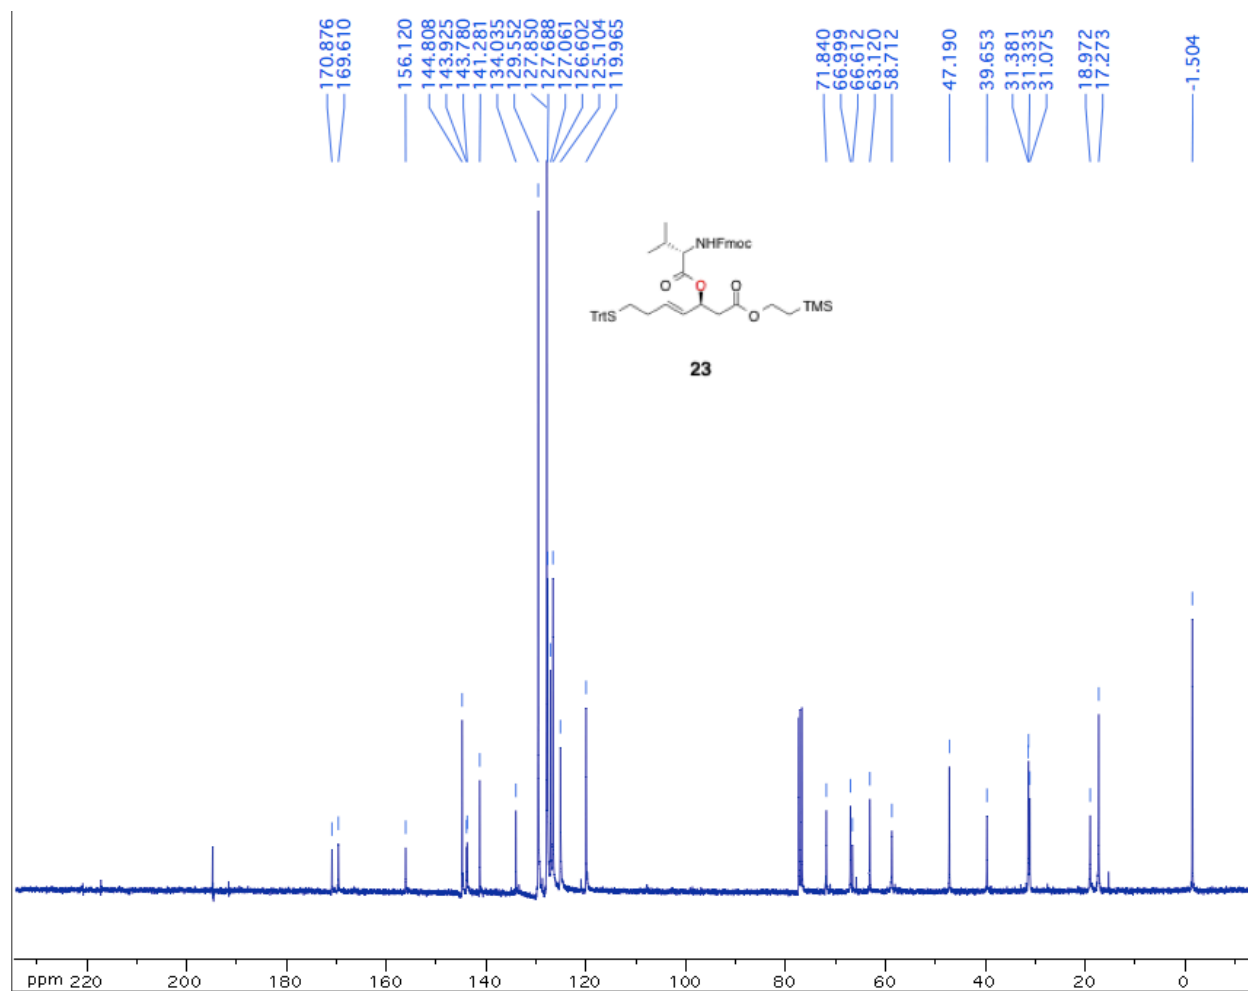

Figure S8.  $^{13}\text{C}$ -NMR spectrum of (*S,E*)-2-(Trimethylsilyl)ethyl 3-(((*S*)-2-(((9*H*-fluoren-9-yl)methoxy)carbonyl)amino)-3-methylbutanoyl)oxy)-7-(tritylthio)hept-4-enoate (**23**).



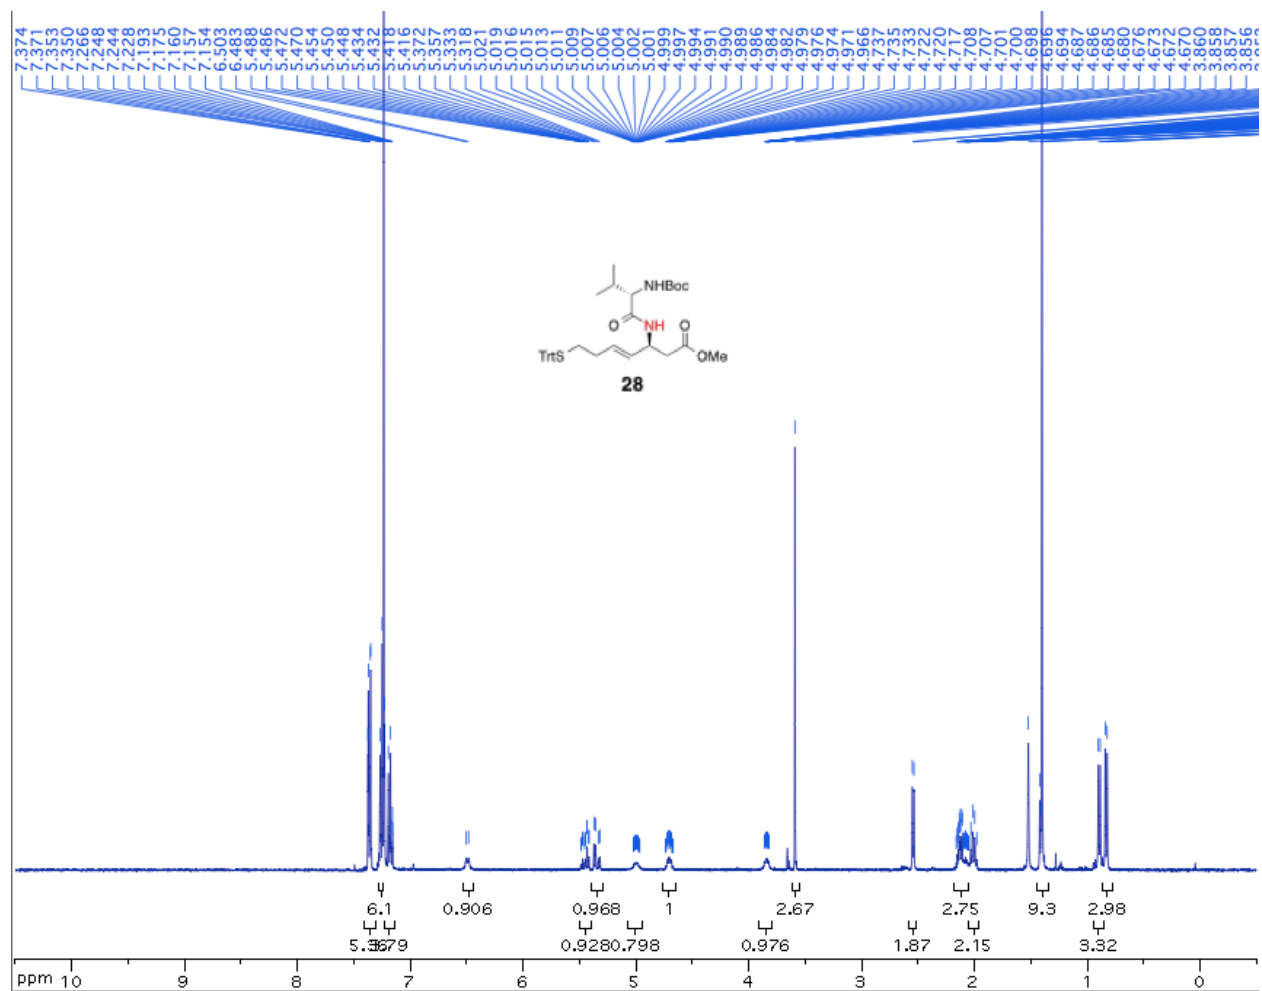

Figure S9. <sup>1</sup>H-NMR spectrum of (*S,E*)-Methyl 3-((*S*)-2-((*tert*-butoxycarbonyl)amino)-3-methylbutanamido)-7-(tritylthio)hept-4-enoate (**28**).

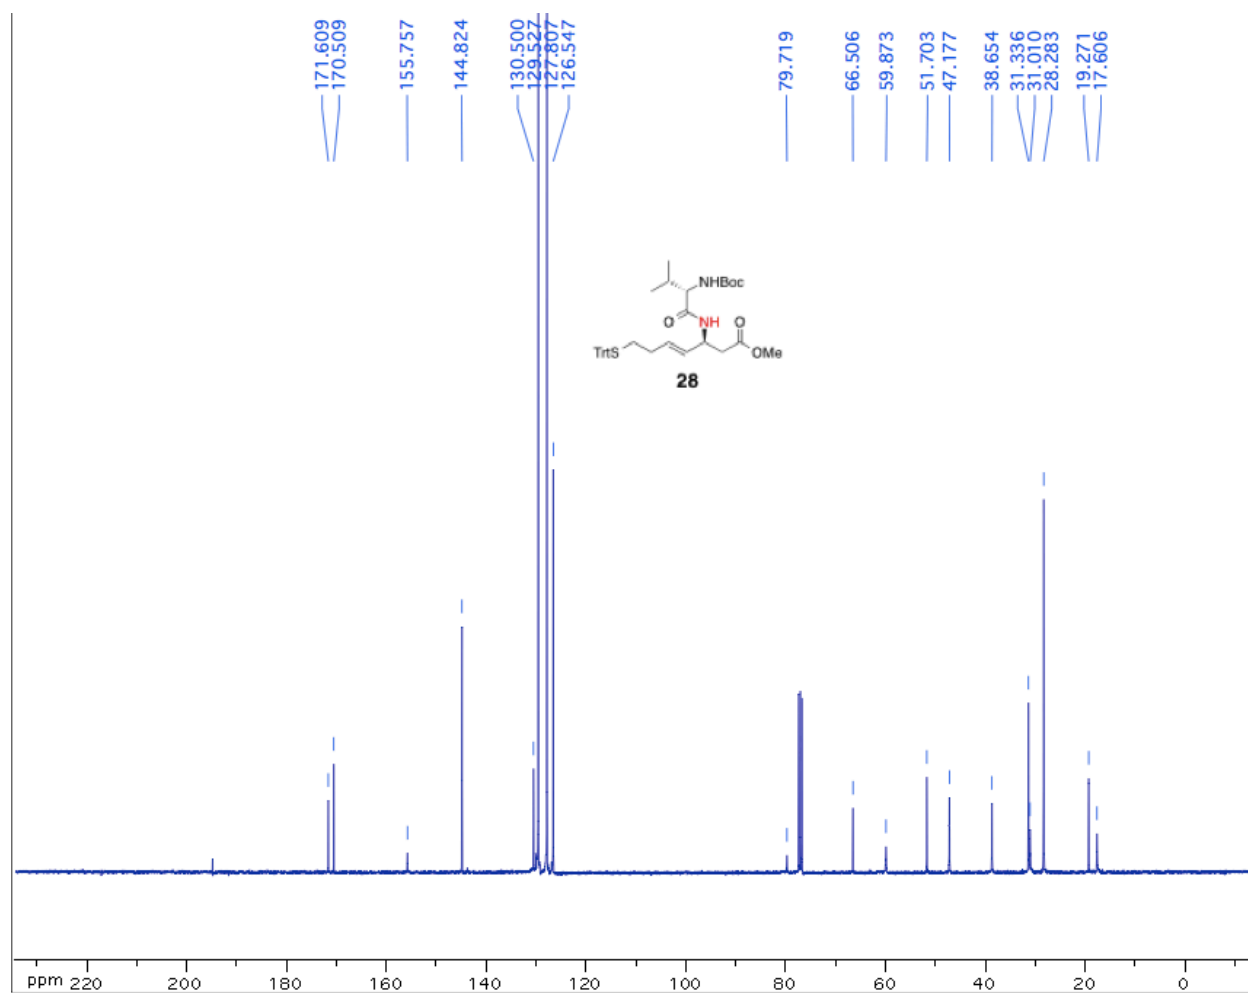

Figure S10.  $^{13}\text{C}$ -NMR spectrum of (*S,E*)-Methyl 3-((*S*)-2-((*tert*-butoxycarbonyl)amino)-3-methylbutanamido)-7-(tritylthio)hept-4-enoate (**28**).

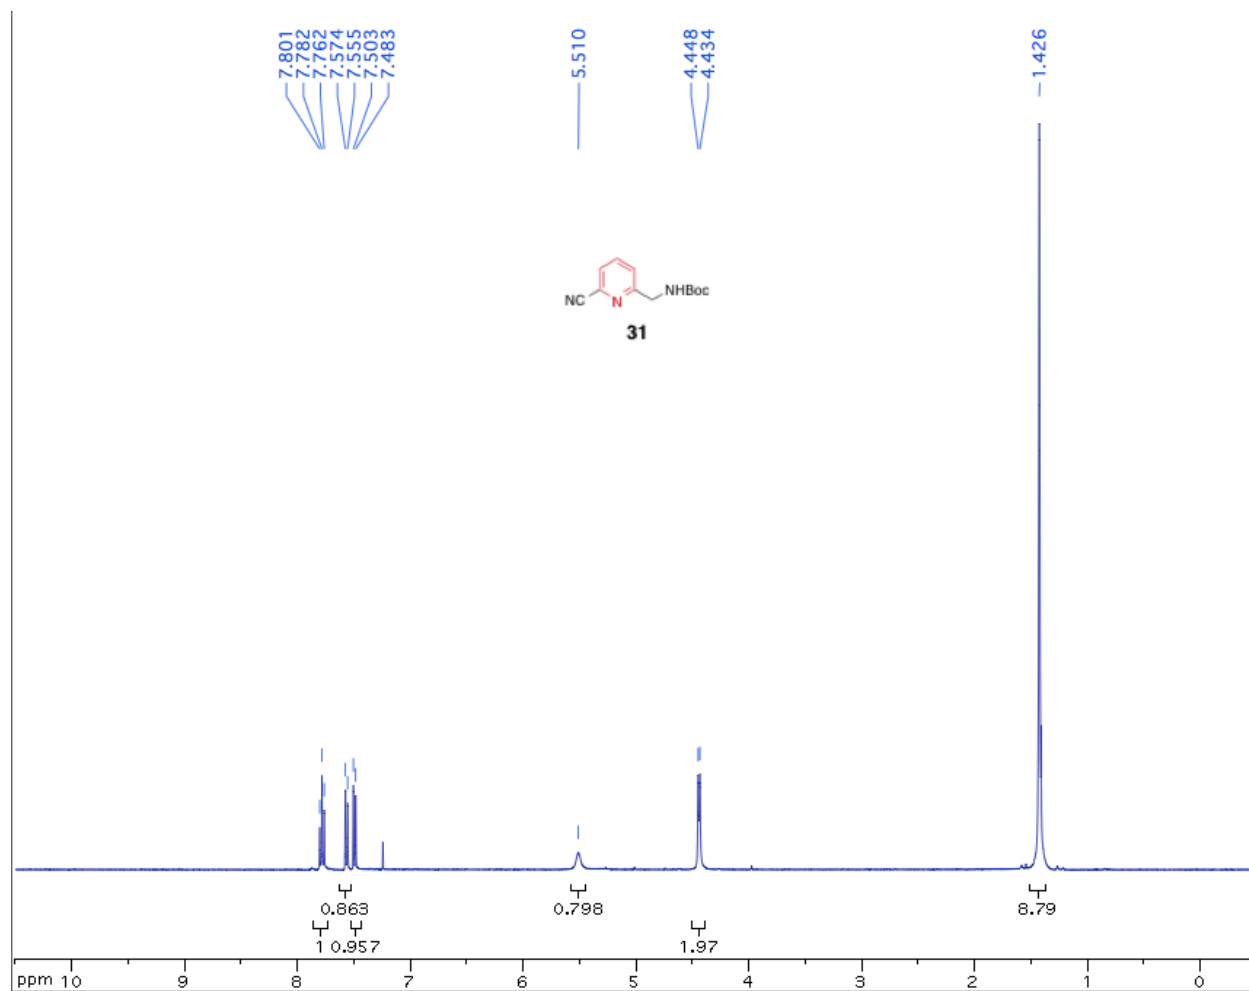

Figure S11.  $^1\text{H-NMR}$  spectrum of 6-(((*tert*-Butoxy)carbonyl)amino)methyl picolinonitrile (**31**).

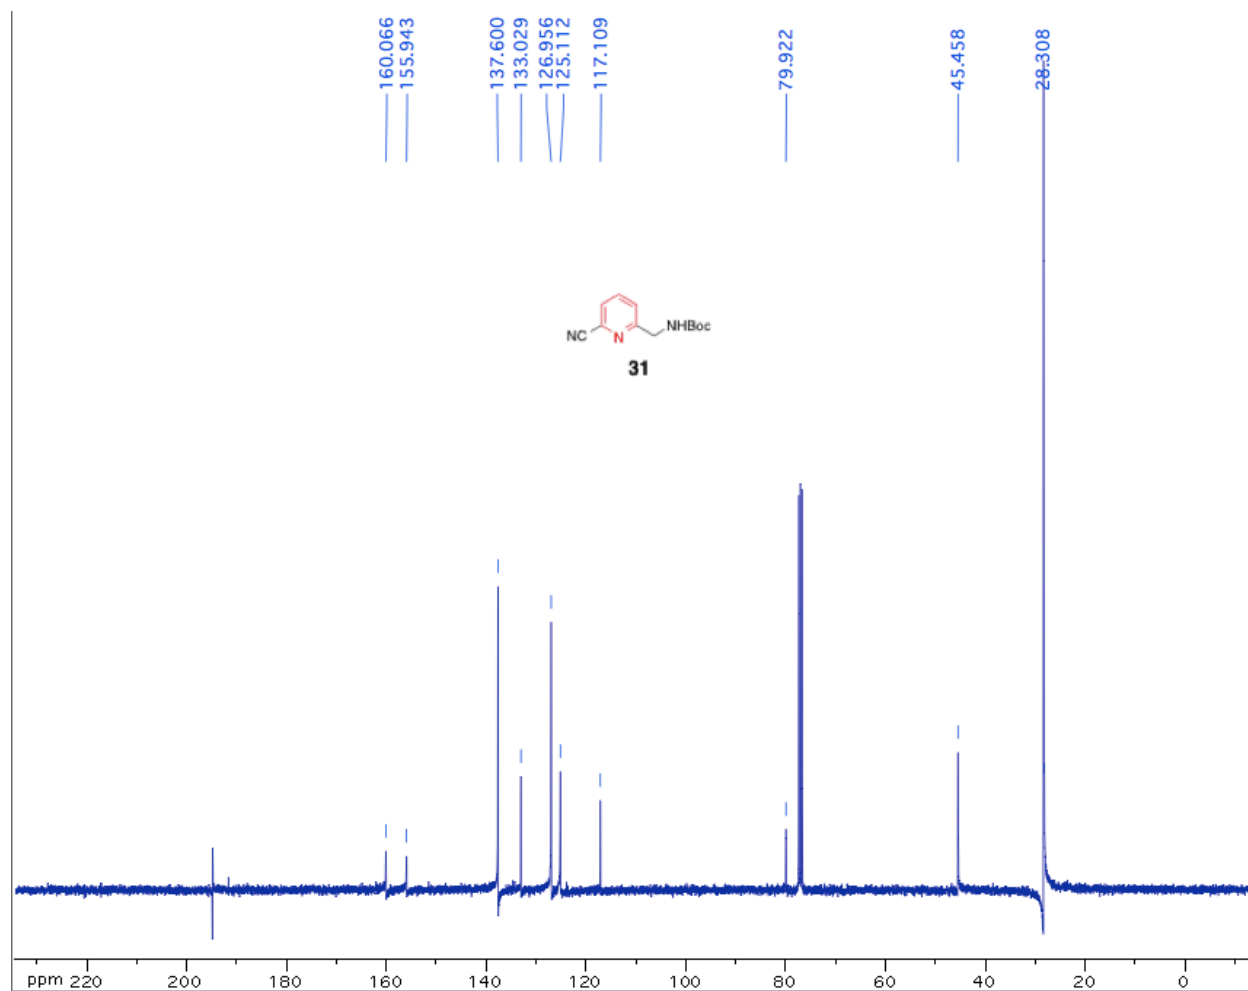

Figure S12.  $^{13}\text{C}$ -NMR spectrum of 6-(((*tert*-Butoxy)carbonyl)amino)methyl picolinonitrile (**31**).

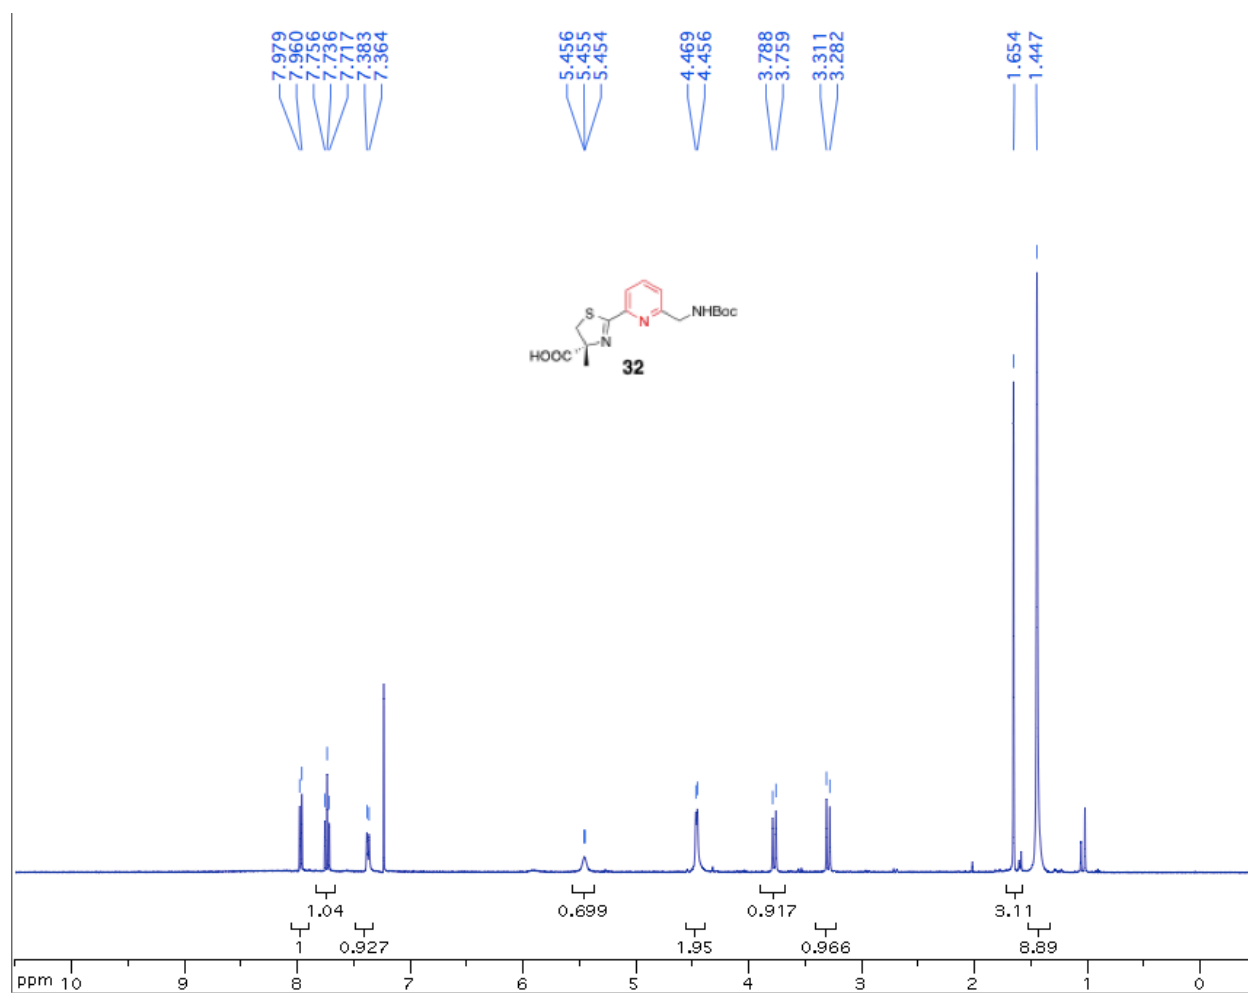

Figure S13.  $^1\text{H-NMR}$  spectrum of (*R*)-2-(6-(((*tert*-Butoxycarbonyl)amino)methyl)pyridin-2-yl)-4-methyl-4,5-dihydrothiazole-4-carboxylic acid (**32**).

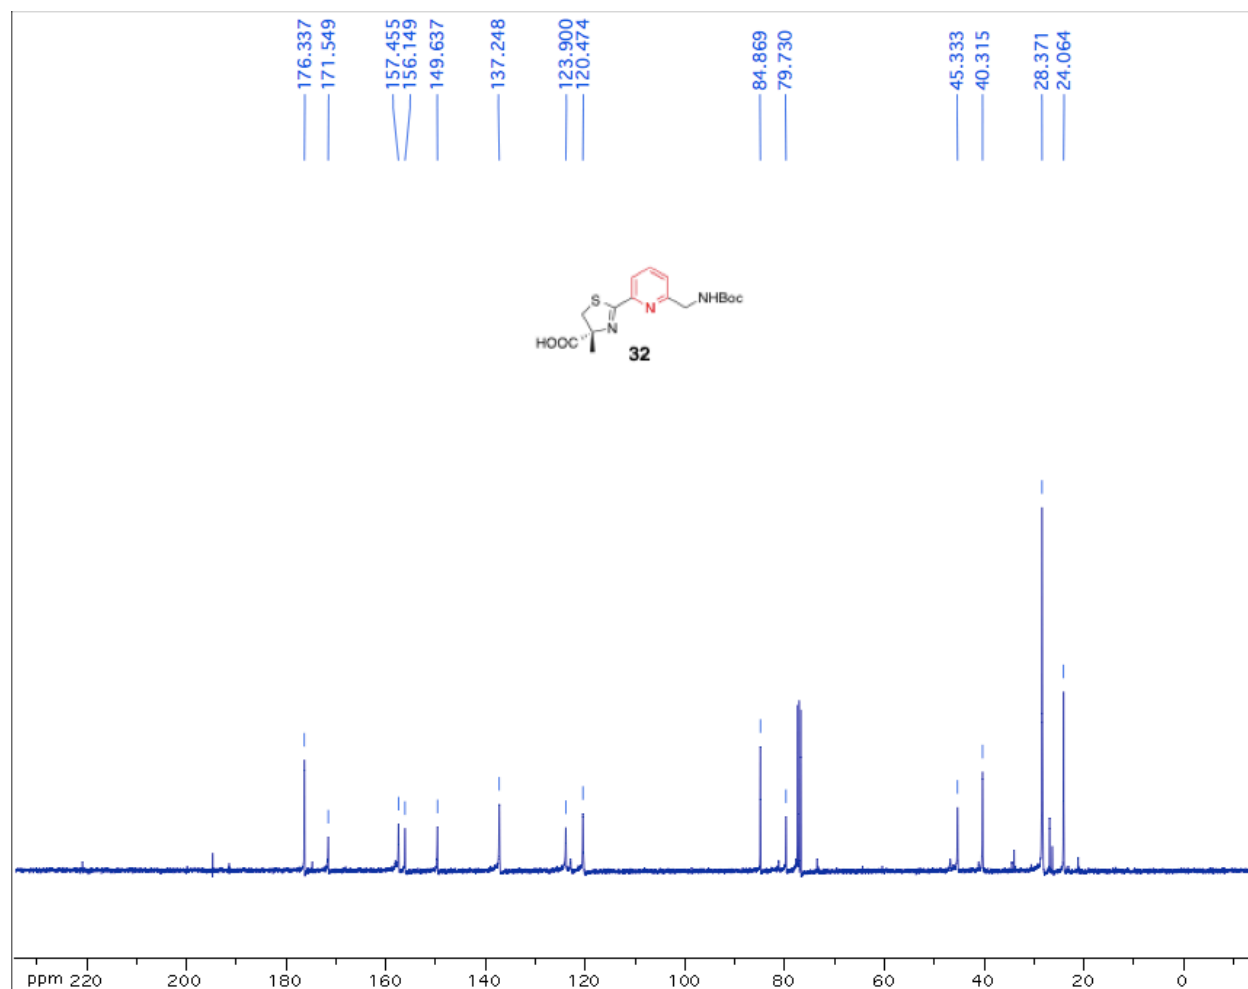

Figure S14. <sup>13</sup>C-NMR spectrum of (*R*)-2-(6-(((*tert*-Butoxycarbonyl)amino)methyl) pyridin-2-yl)-4-methyl-4,5-dihydrothiazole-4-carboxylic acid (**32**).

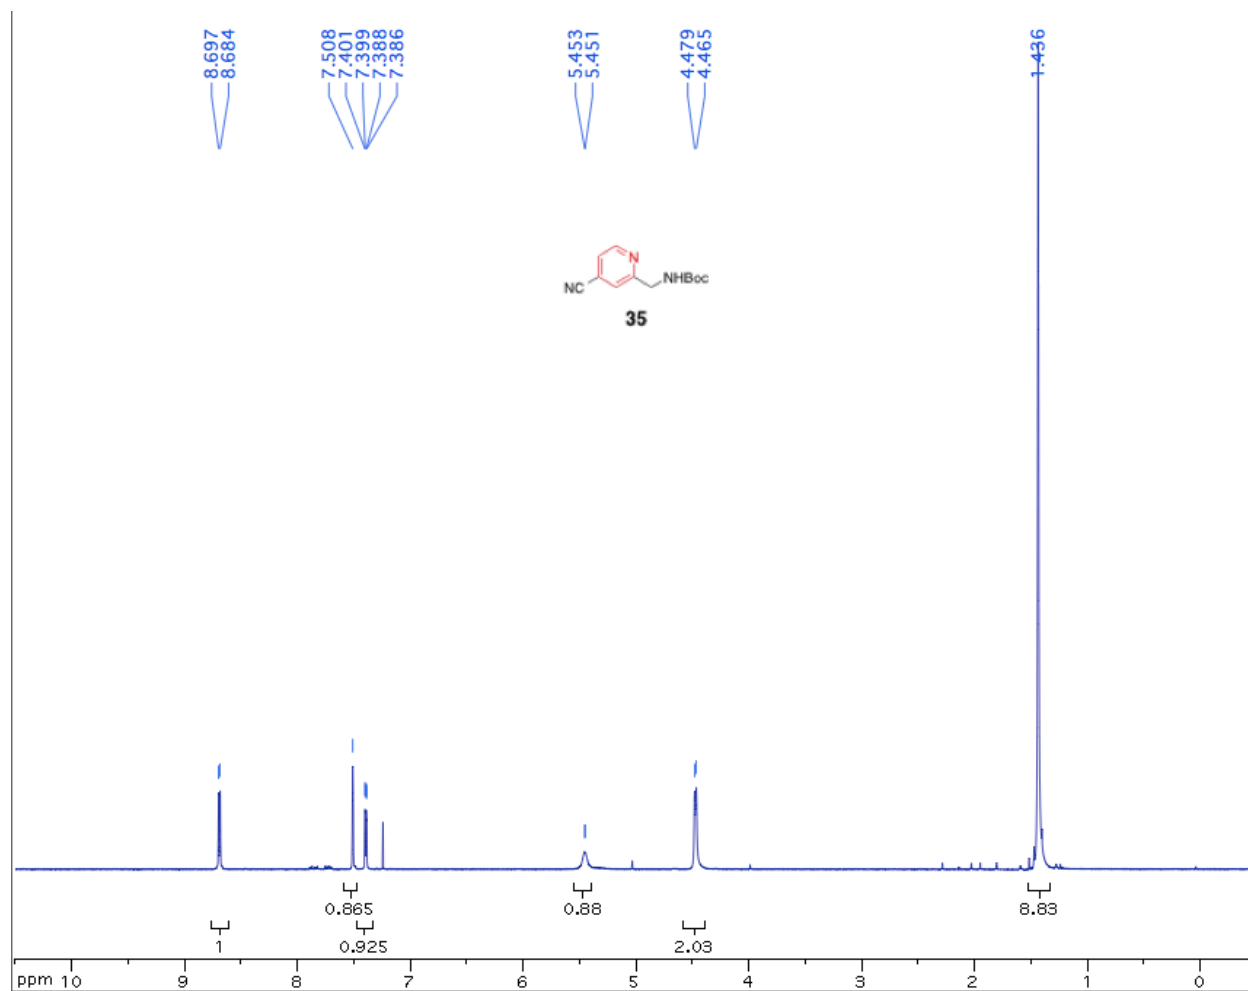

Figure S15.  $^1\text{H}$ -NMR spectrum of 2-(((*tert*-Butoxy)carbonyl)amino)methyl)isonicotinonitrile (**35**).

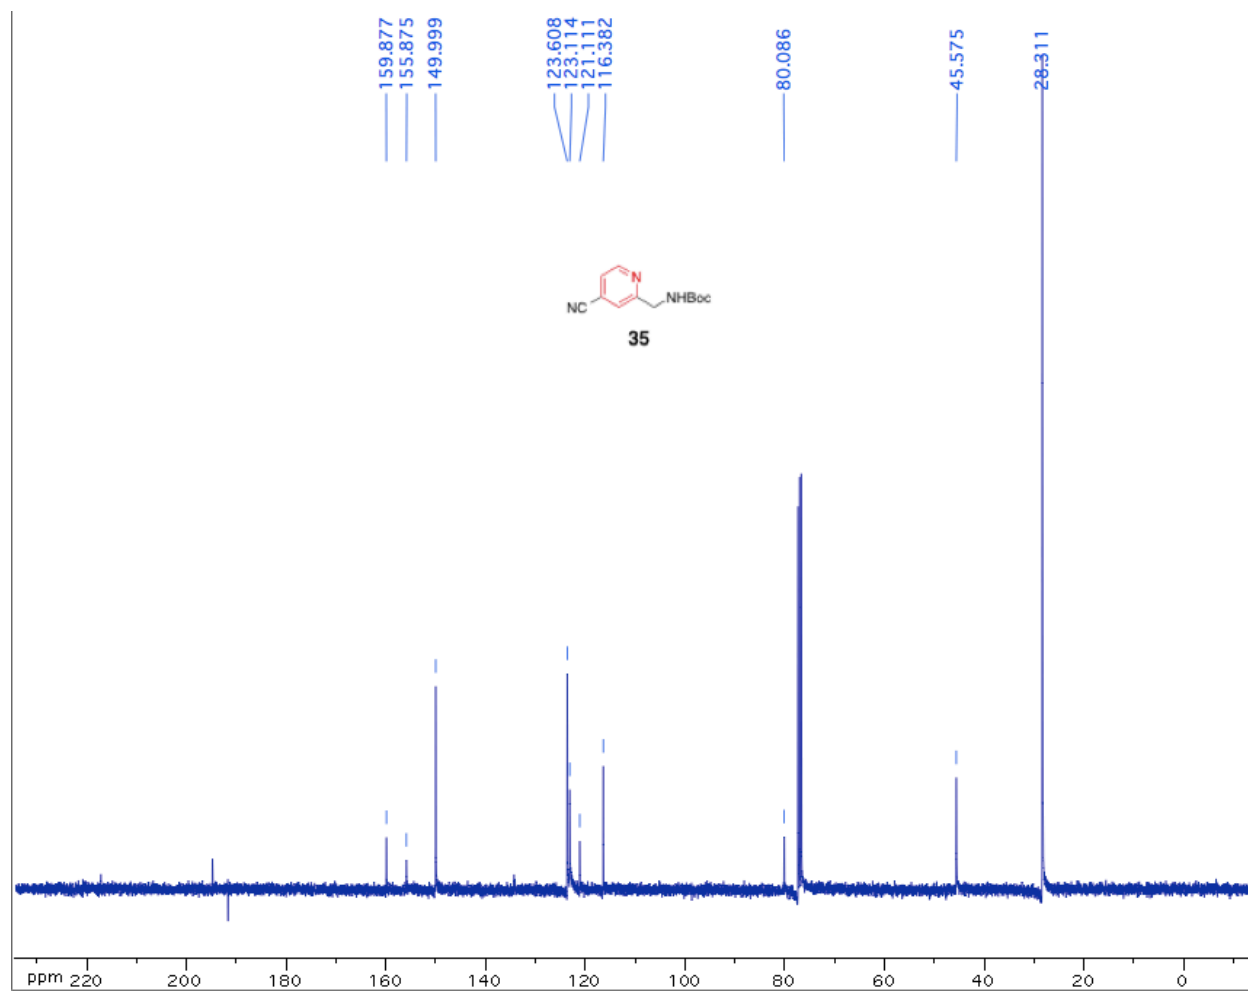

Figure S16. <sup>13</sup>C-NMR spectrum of 2-(((*tert*-Butoxy)carbonyl)amino)methylisonicotinonitrile (**35**).



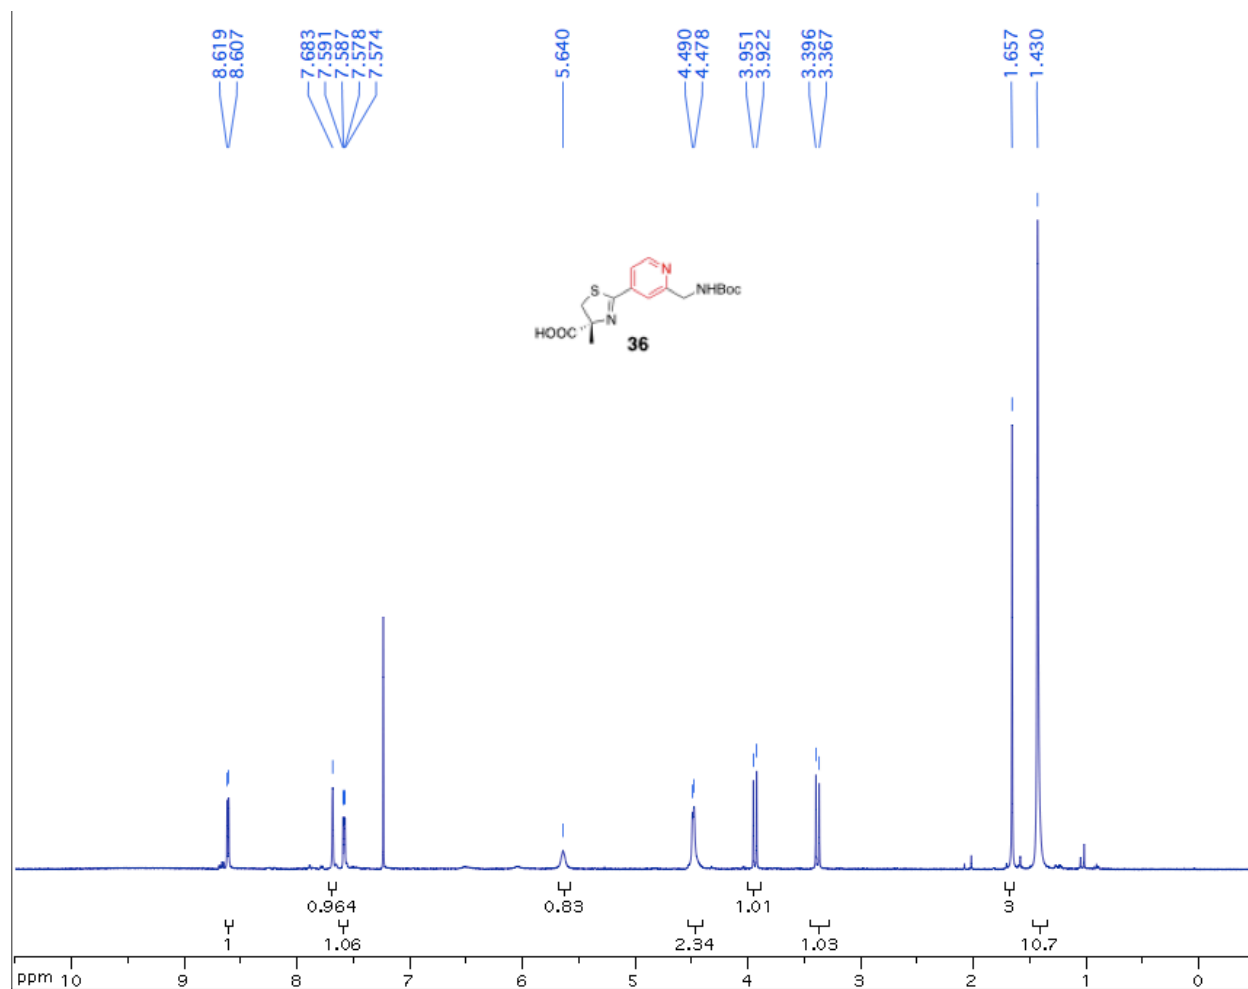

Figure S17.  $^1\text{H}$ -NMR spectrum of (*R*)-2-(2-(((*tert*-Butoxycarbonyl)amino)methyl)pyridin-4-yl)-4-methyl-4,5-dihydrothiazole-4-carboxylic acid (**36**).

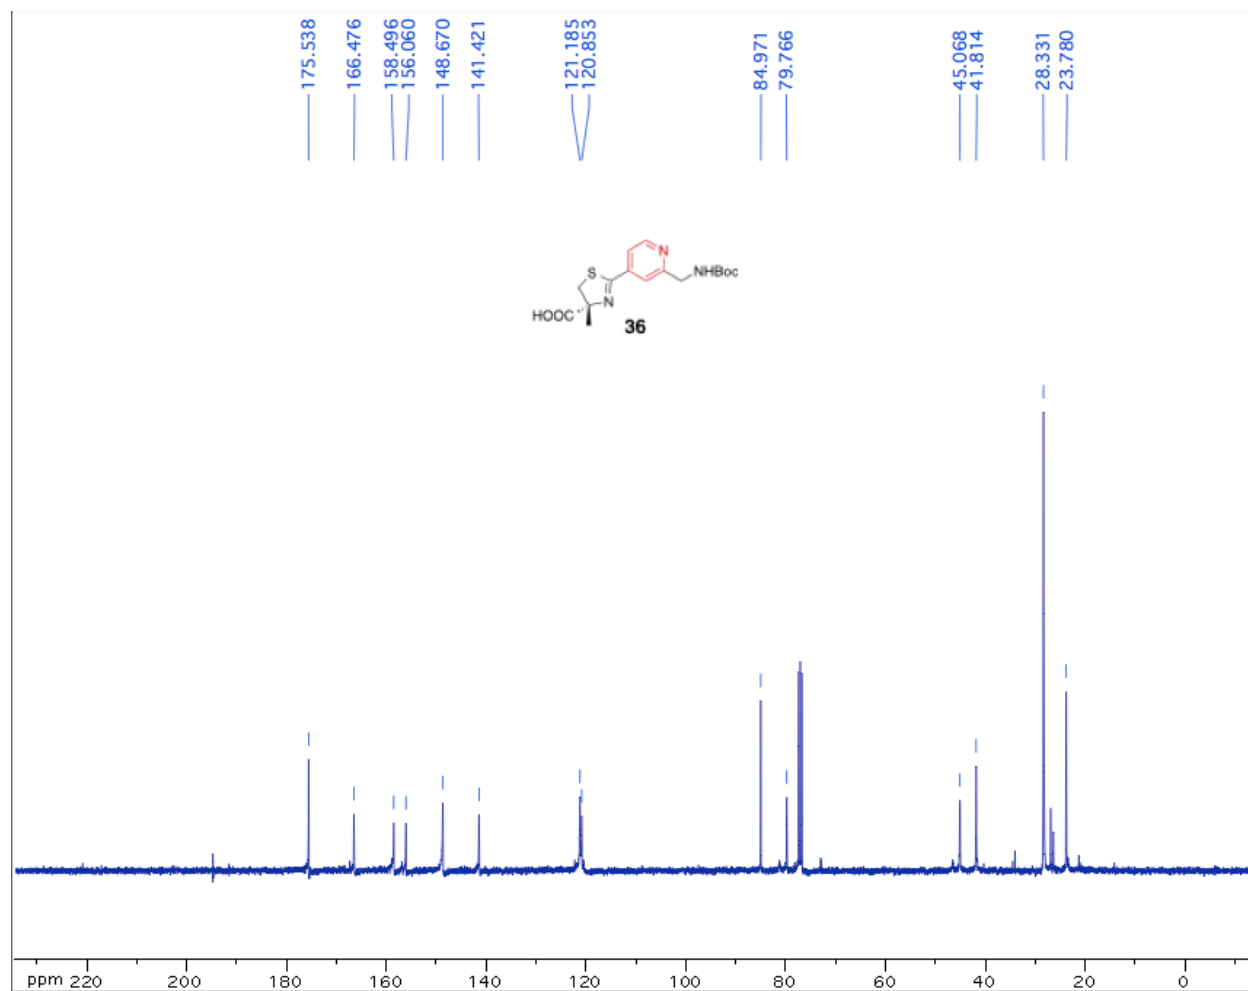

Figure S18.  $^{13}\text{C}$ -NMR spectrum of (*R*)-2-(2-(((*tert*-Butoxycarbonyl)amino)methyl) pyridin-4-yl)-4-methyl-4,5-dihydrothiazole-4-carboxylic acid (**36**).

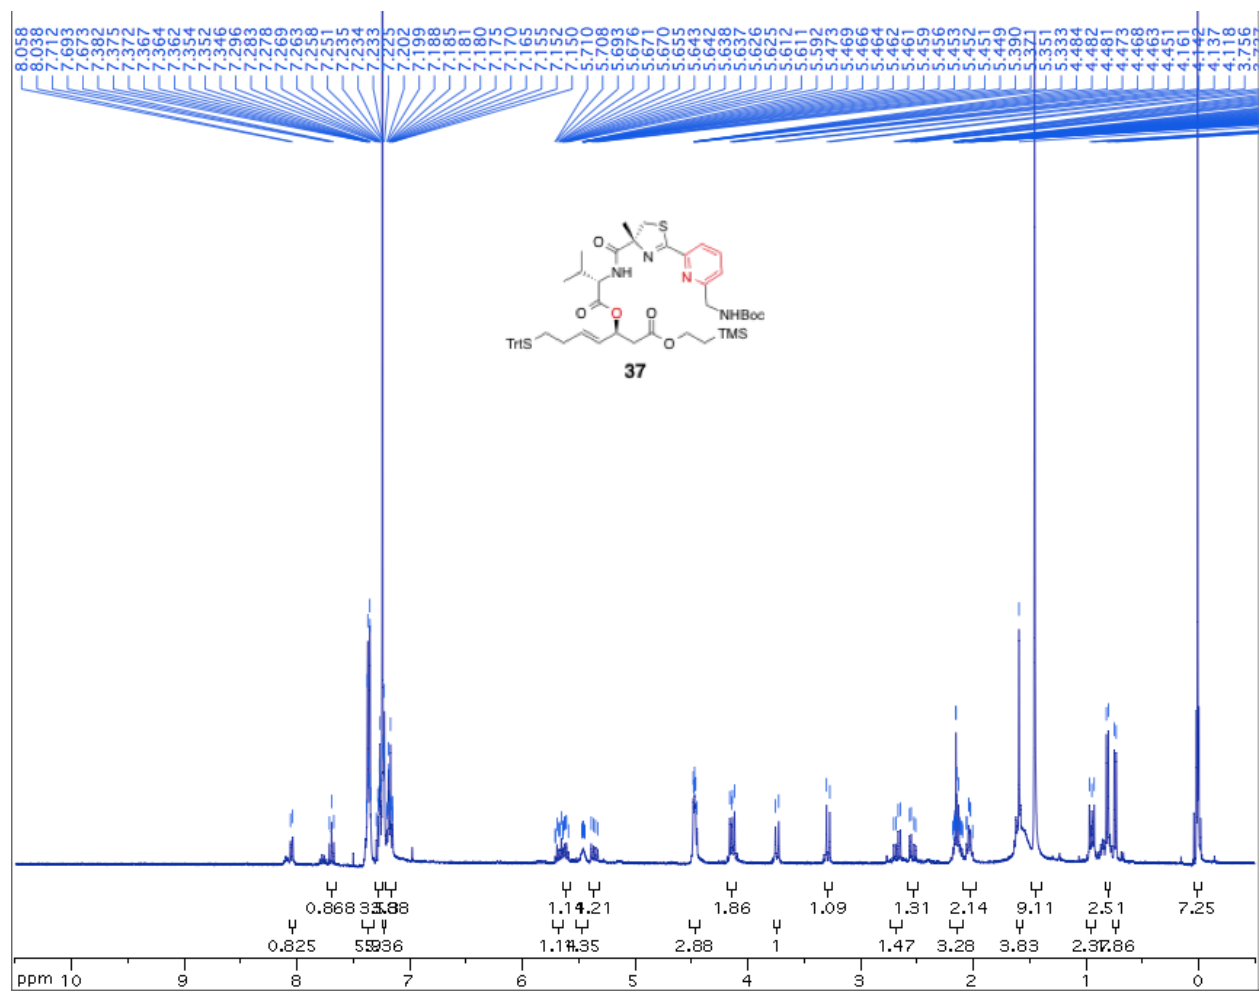

Figure S19.  $^1\text{H-NMR}$  spectrum of (*S,E*)-2-(Trimethylsilyl)ethyl 3-(((*S*)-2-((*R*)-2-(6-(((*tert*-butoxycarbonyl)amino)methyl)pyridin-2-yl)-4-methyl-4,5-dihydrothiazole-4-carboxamido)-3-methylbutanoyl)oxy)-7-(tritylthio)hept-4-enoate (**37**).

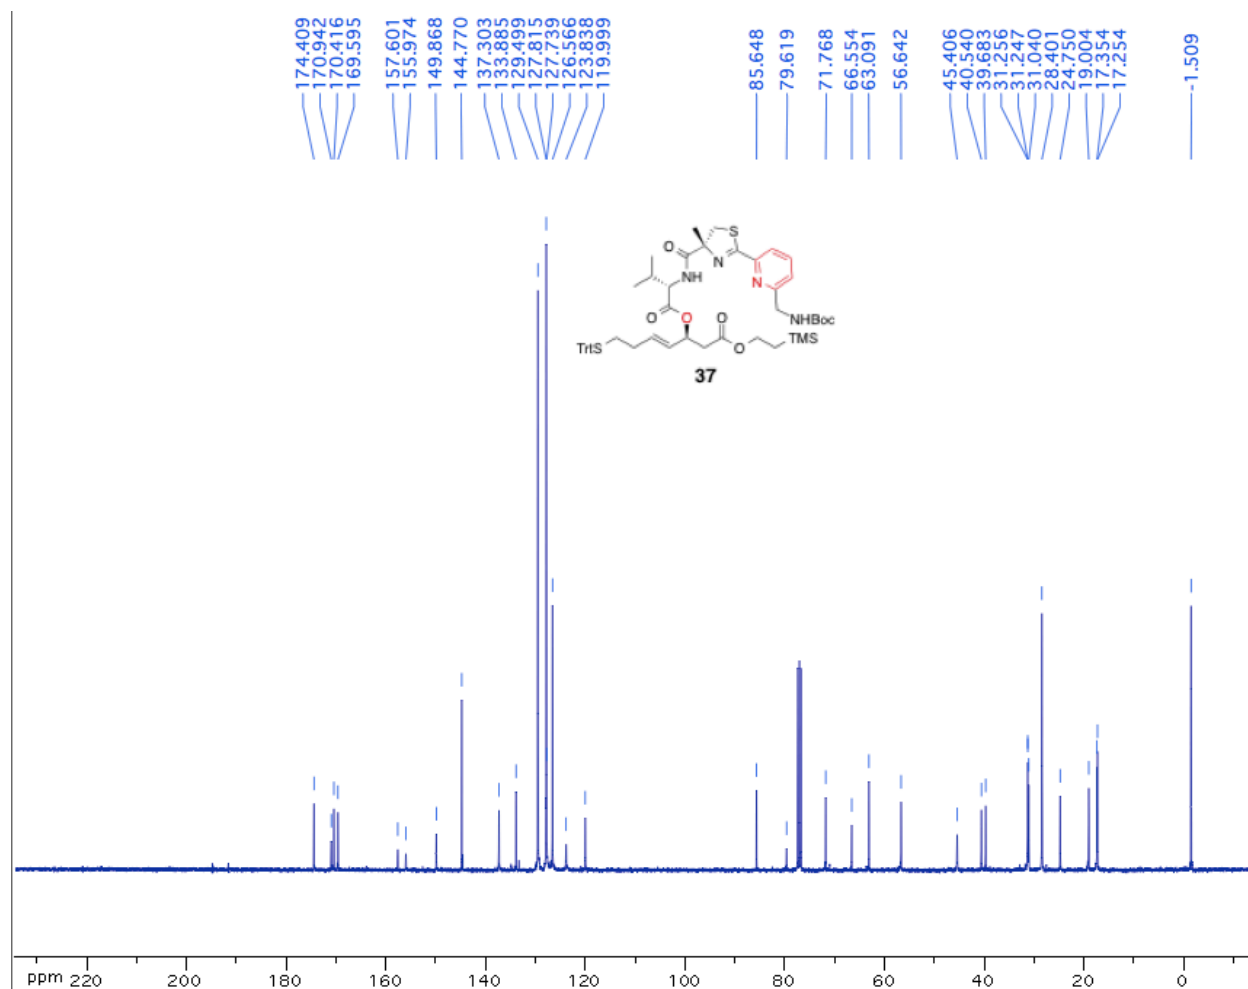

Figure S20.  $^{13}\text{C}$ -NMR spectrum of (*S,E*)-2-(Trimethylsilyl)ethyl 3-(((*S*)-2-((*R*)-2-(6-(((*tert*-butoxycarbonyl)amino)methyl)pyridin-2-yl)-4-methyl-4,5-dihydrothiazole-4-carboxamido)-3-methylbutanoyl)oxy)-7-(tritylthio)hept-4-enoate (**37**).

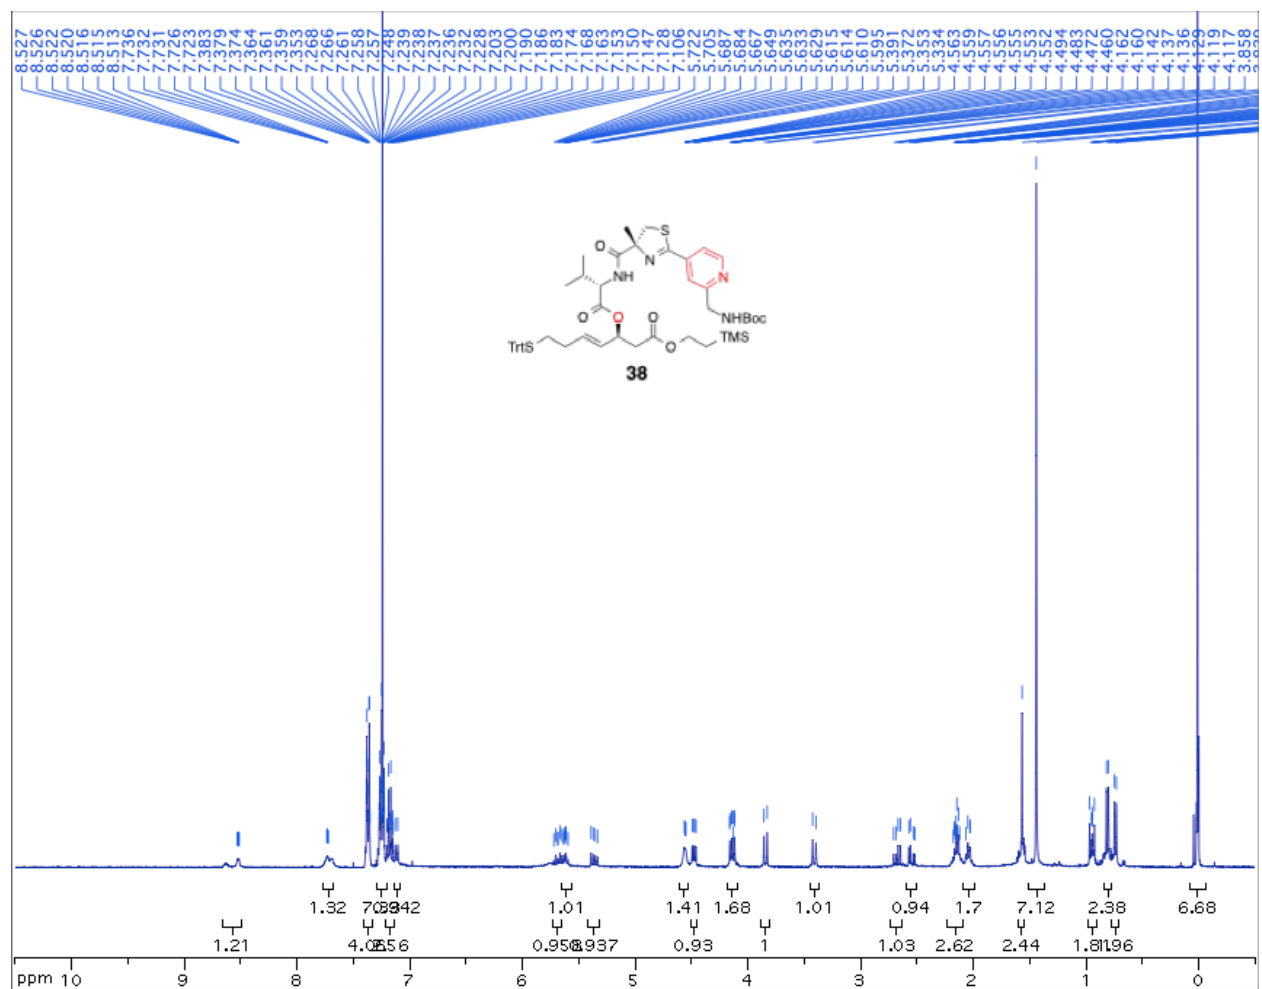

Figure S21. <sup>1</sup>H-NMR spectrum of (*S,E*)-2-(Trimethylsilyl)ethyl 3-(((*S*)-2-((*R*)-2-(2-(((*tert*-butoxycarbonyl)amino)methyl)pyridin-4-yl)-4-methyl-4,5-dihydrothiazole-4-carboxamido)-3-methylbutanoyl)oxy)-7-(tritylthio)hept-4-enoate (**38**).

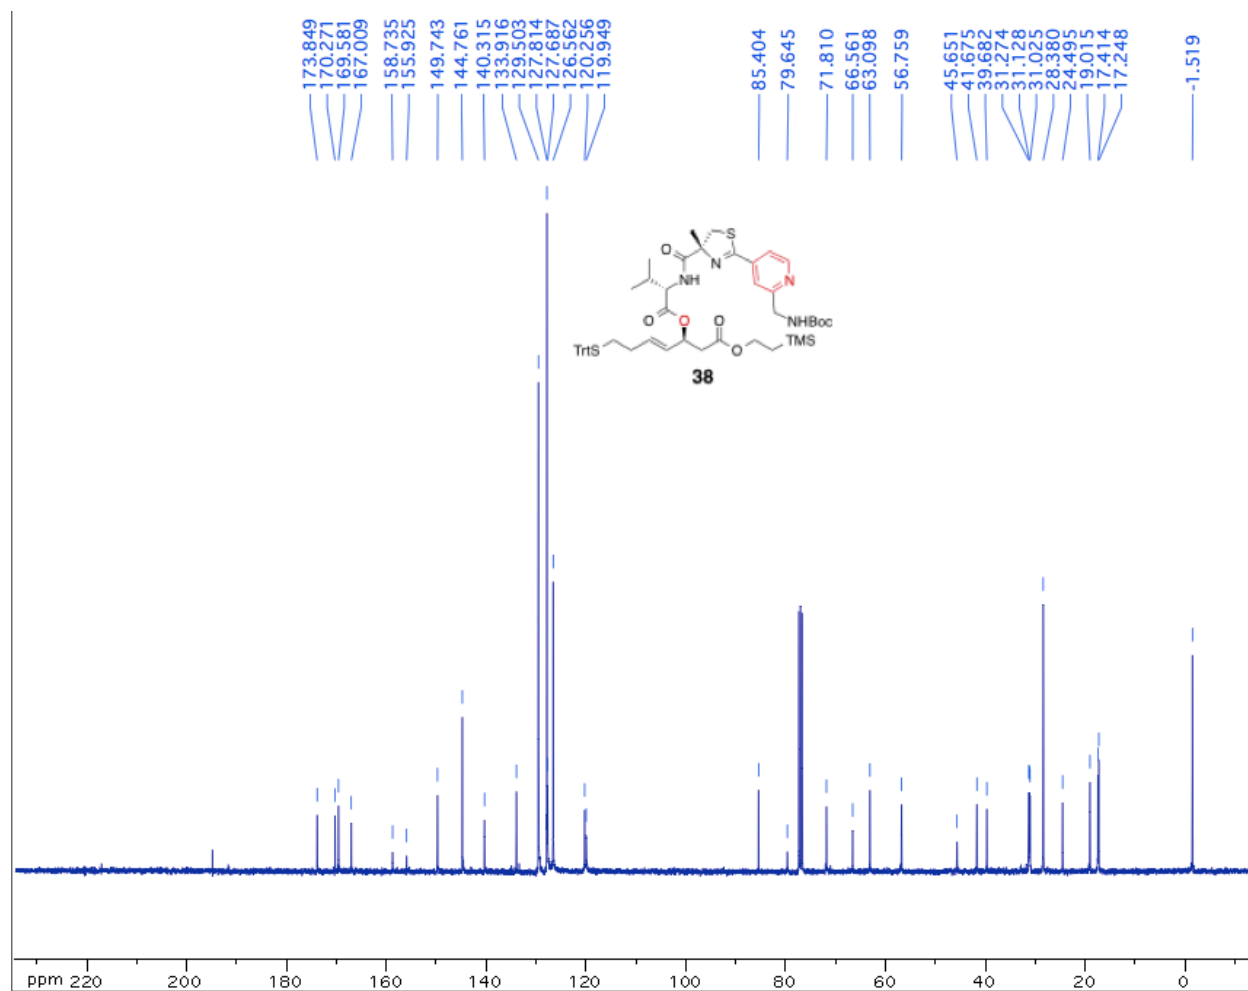

Figure S22.  $^{13}\text{C}$ -NMR spectrum of (*S,E*)-2-(Trimethylsilyl)ethyl 3-(((*S*)-2-((*R*)-2-(2-(((*tert*-butoxycarbonyl)amino)methyl)pyridin-4-yl)-4-methyl-4,5-dihydrothiazole-4-carboxamido)-3-methylbutanoyl)oxy)-7-(tritylthio)hept-4-enoate (**38**).

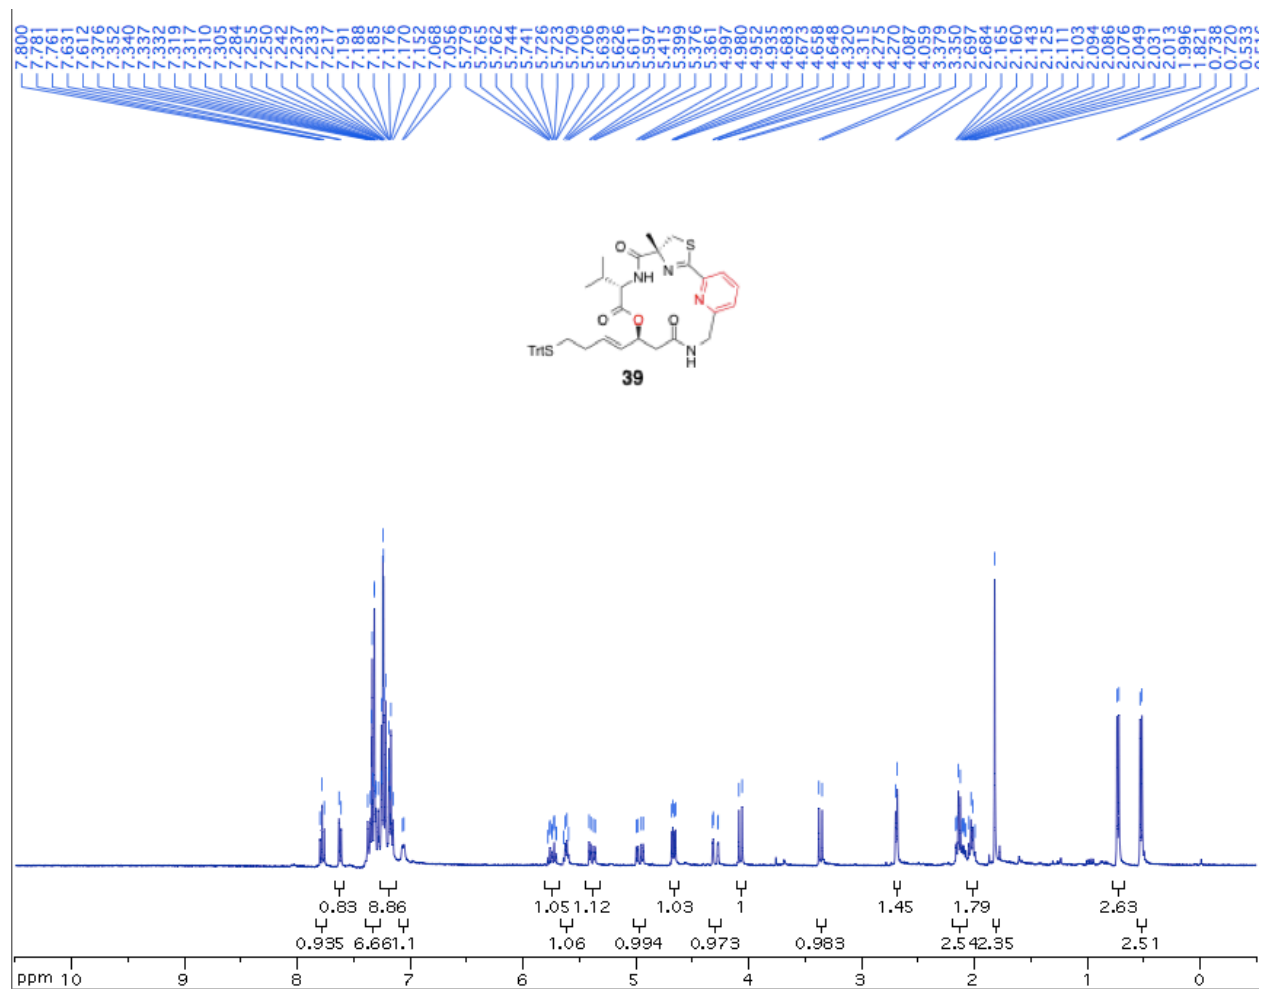

Figure S23.  $^1\text{H-NMR}$  spectrum of trityl protected depsipeptide pyridyl “IN” macrocycle (**39**).

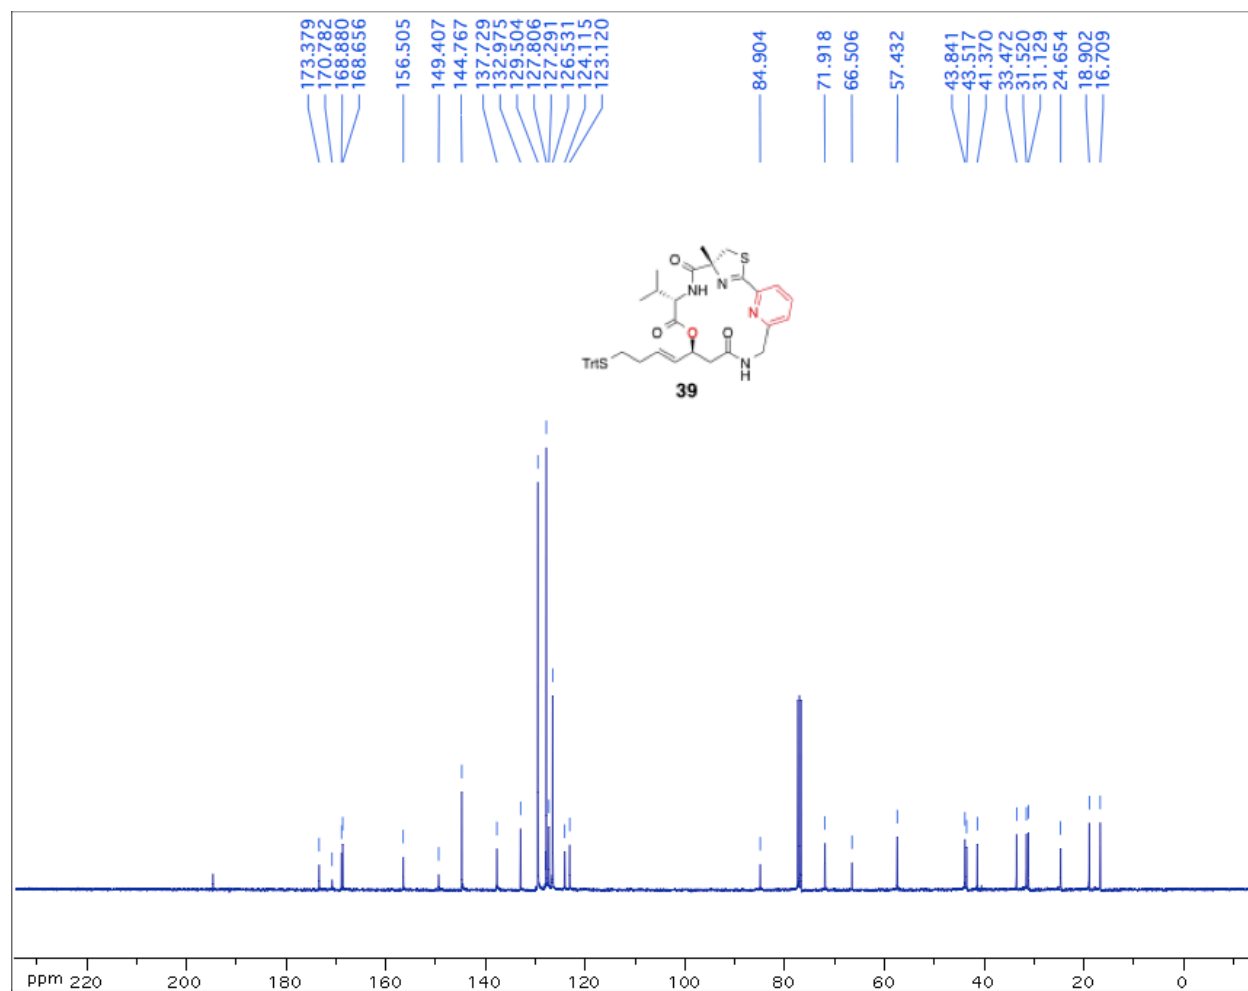

Figure S24.  $^{13}\text{C}$ -NMR spectrum of trityl protected depsipeptide pyridyl “IN” macrocycle (**39**).



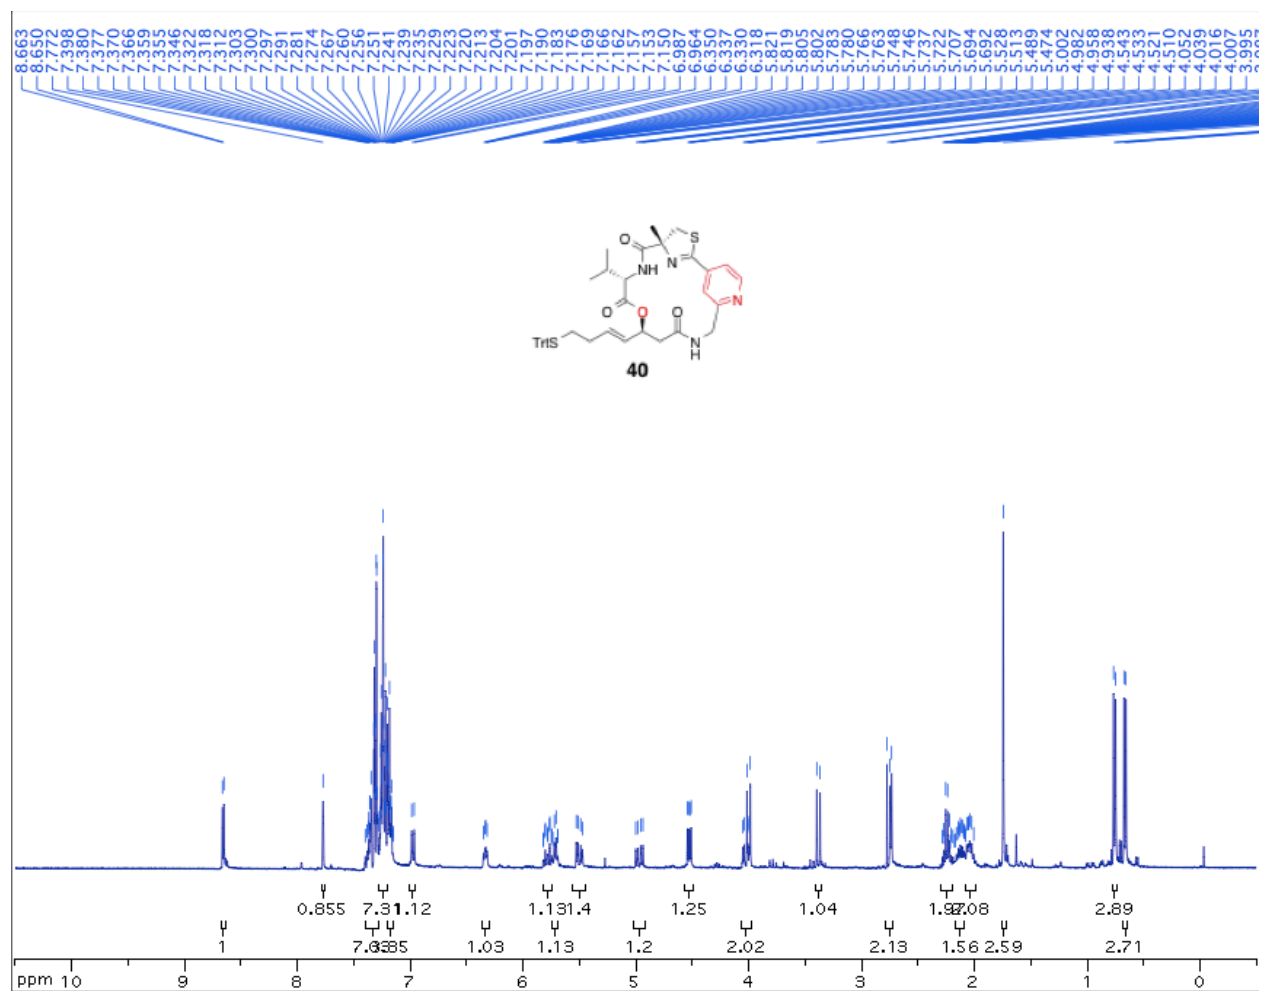

Figure S25. <sup>1</sup>H-NMR spectrum of trityl protected depsipeptide pyridyl “OUT” macrocycle (40).

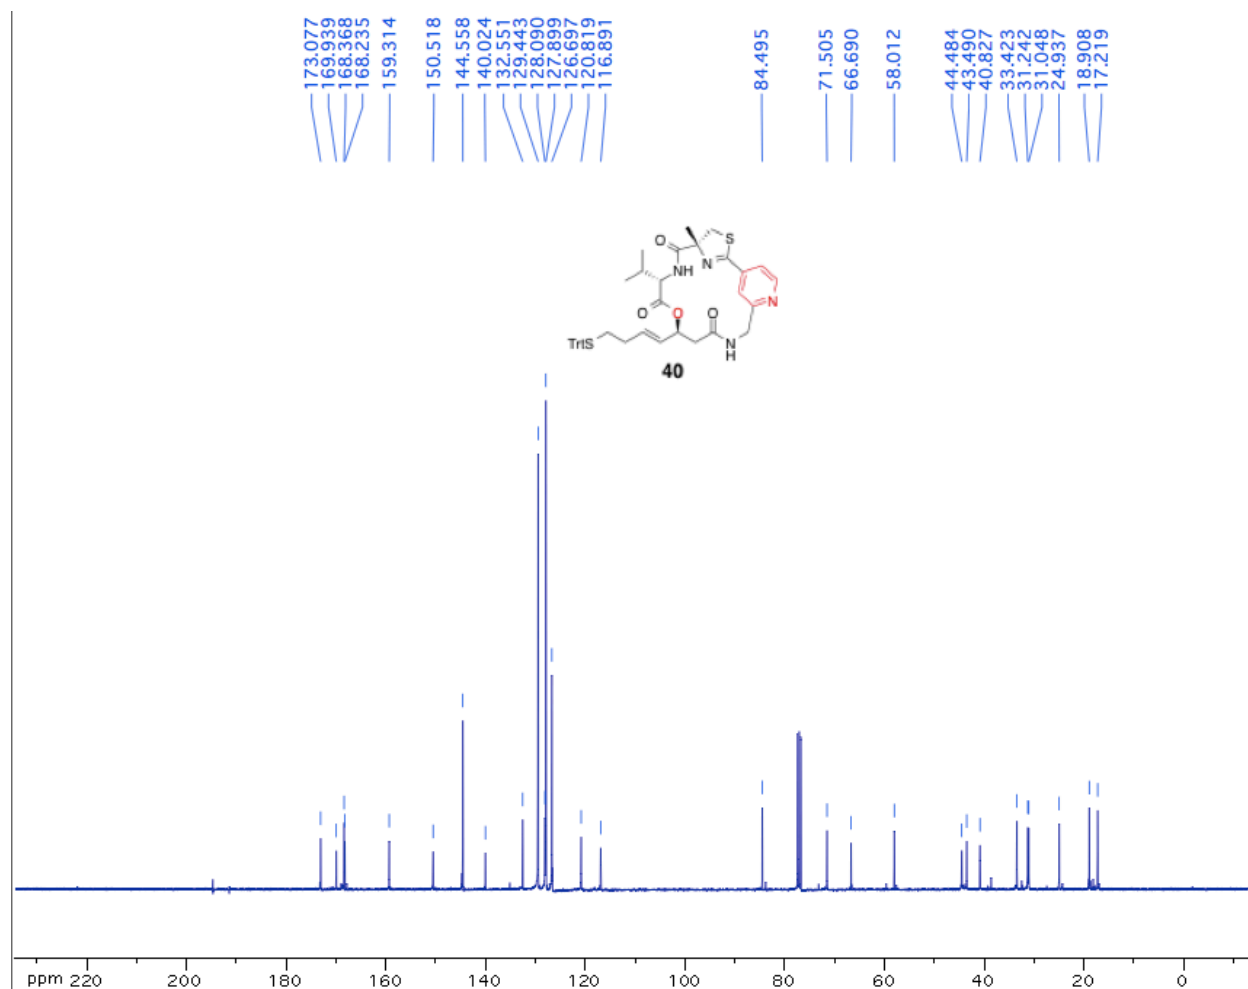

Figure S26.  $^{13}\text{C}$ -NMR spectrum of of trityl protected depsipeptide pyridyl “OUT” macrocycle (**40**).

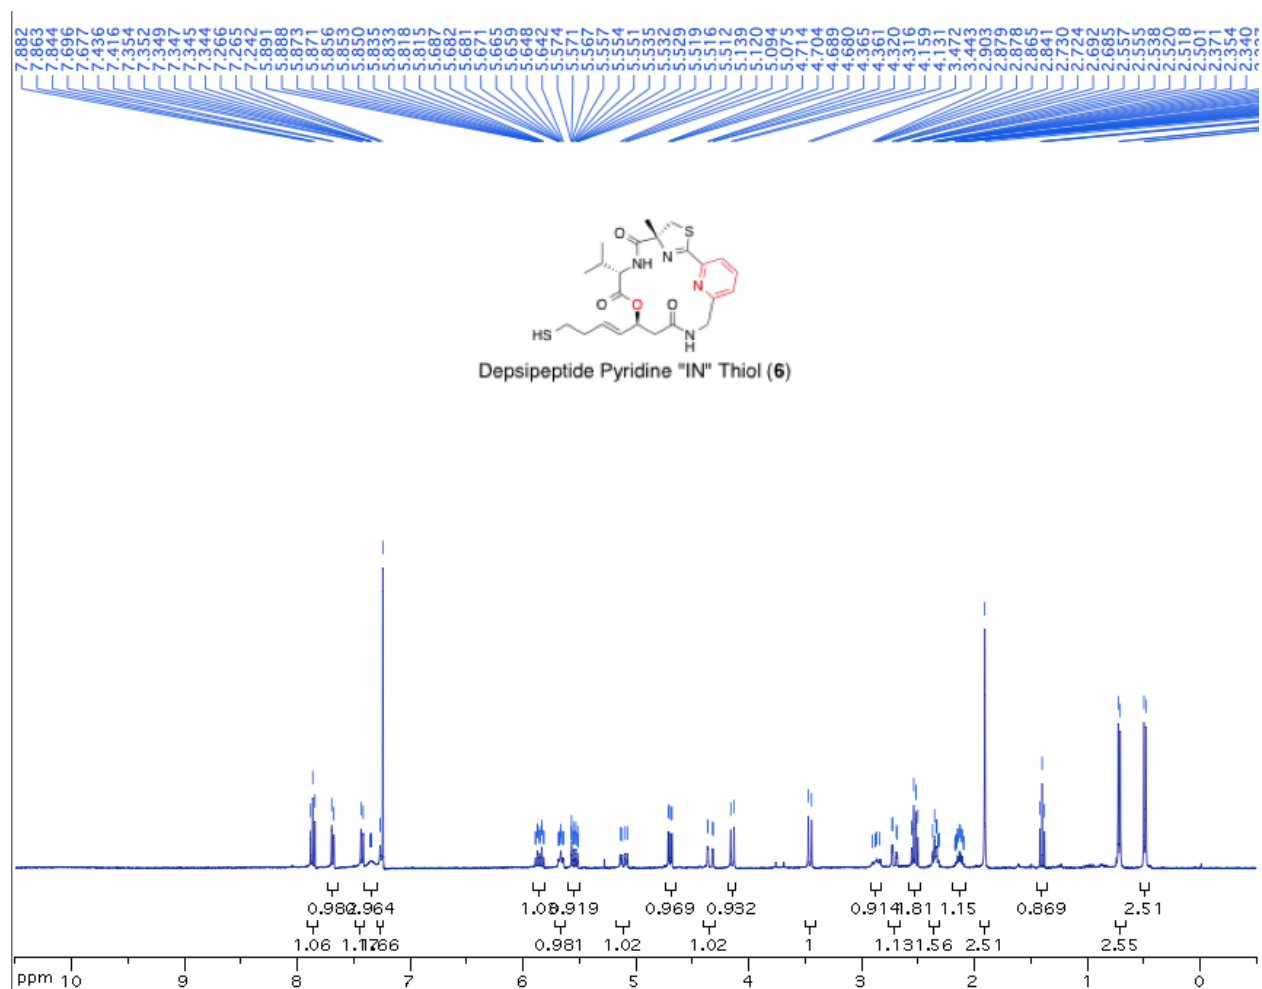

Figure S27. <sup>1</sup>H-NMR spectrum of depsipeptide pyridyl "IN" thiol (6).

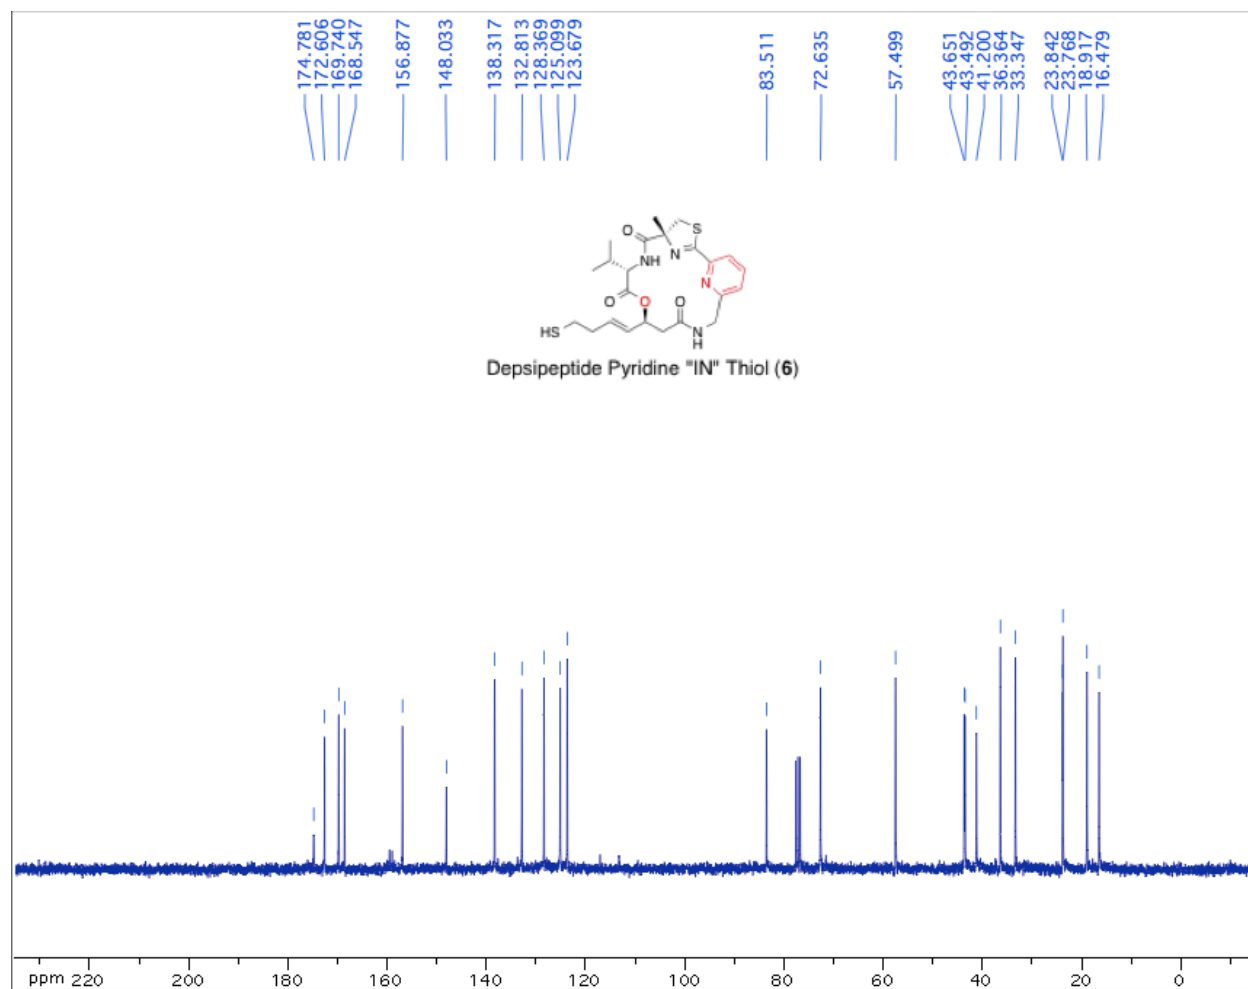

Figure S28. <sup>13</sup>C-NMR spectrum of depsipeptide pyridyl "IN" thiol (6).

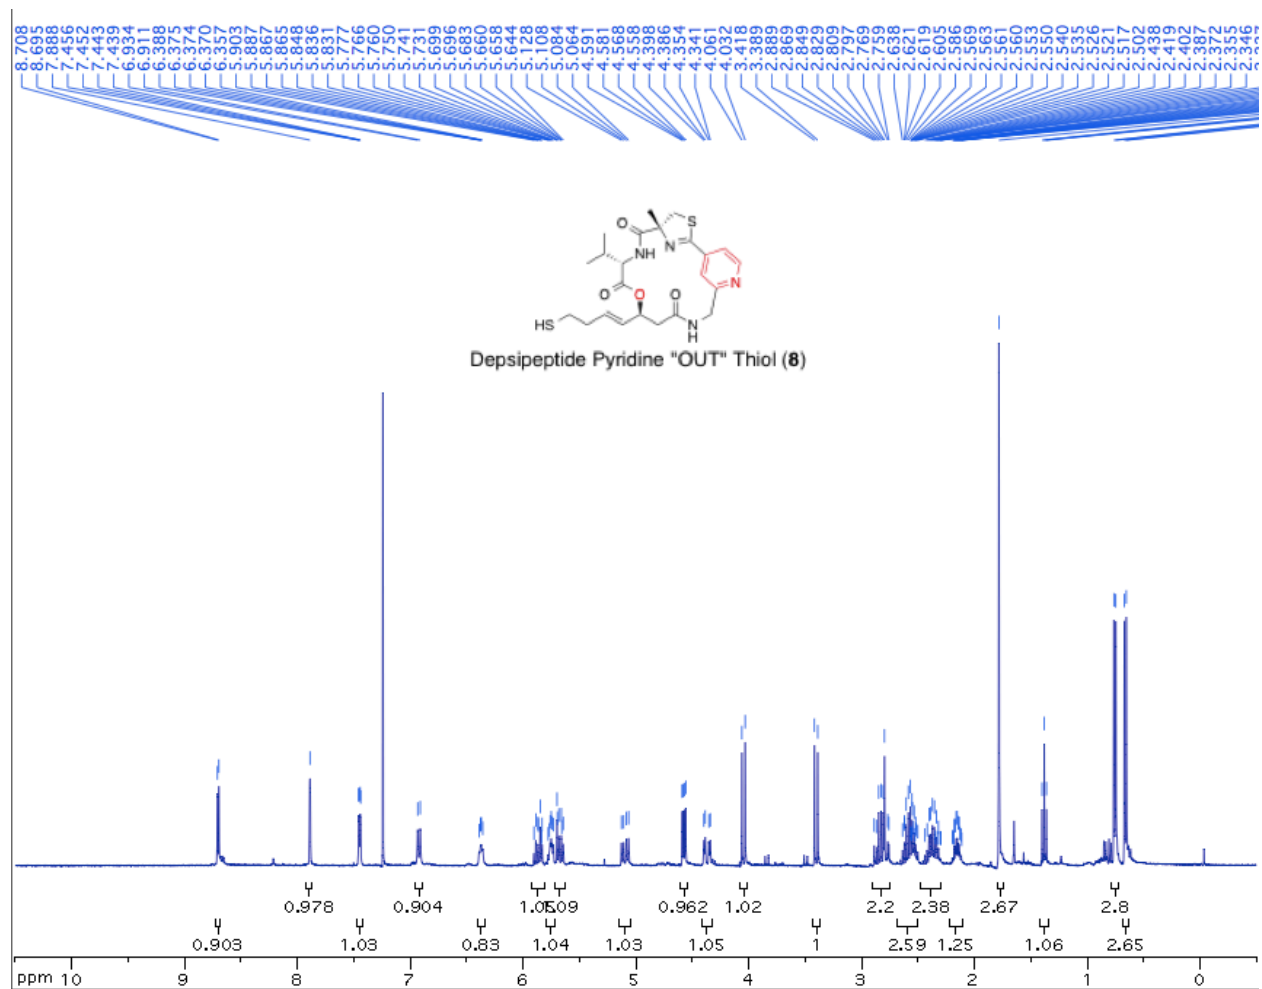

Figure S29. <sup>1</sup>H-NMR spectrum of depsipeptide pyridyl “OUT” thiol (8).

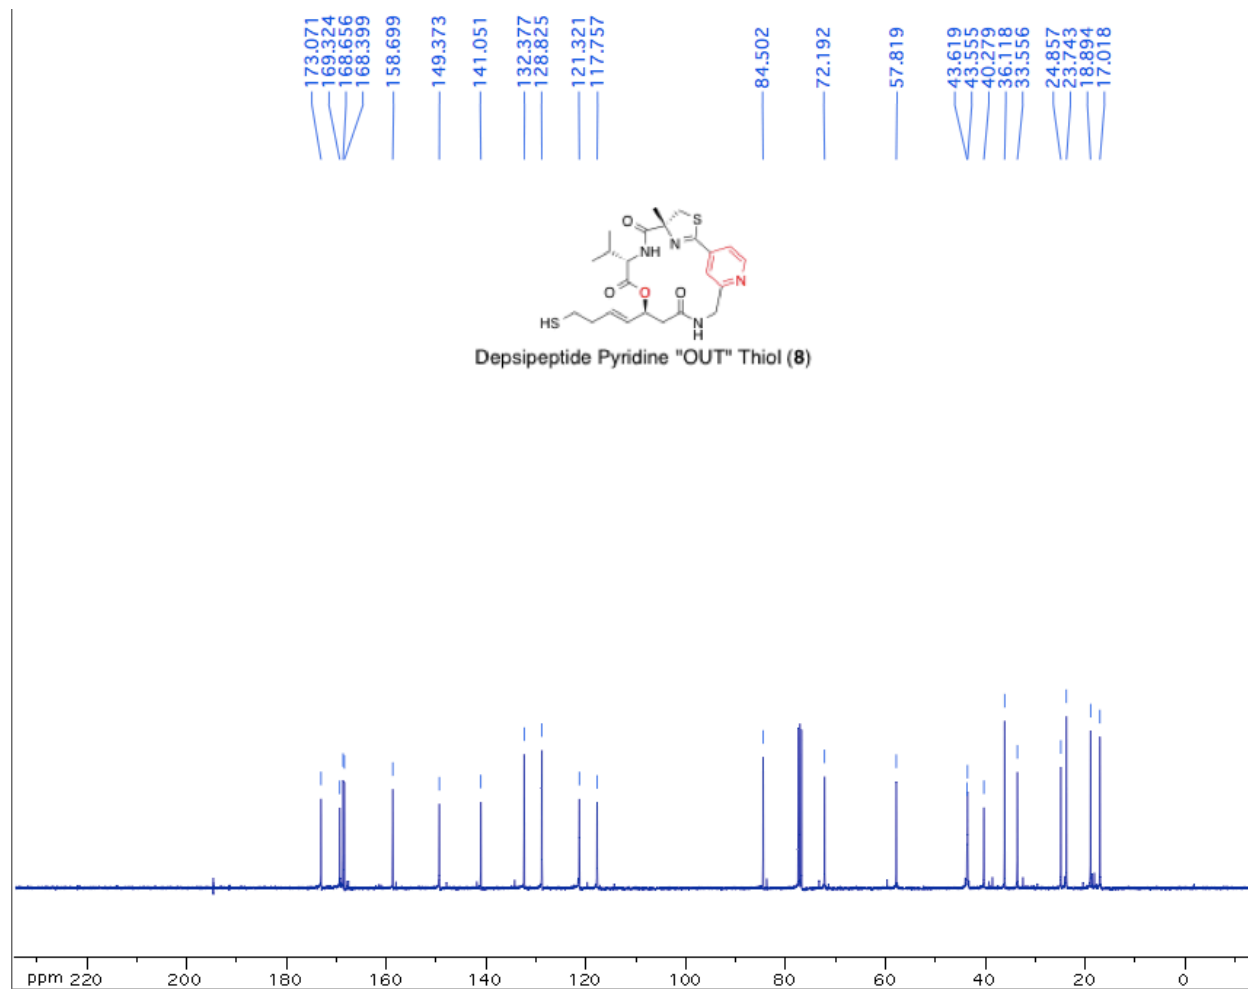

Figure S30.  $^{13}\text{C}$ -NMR spectrum of depsipeptide pyridyl "OUT" thiol (**8**).

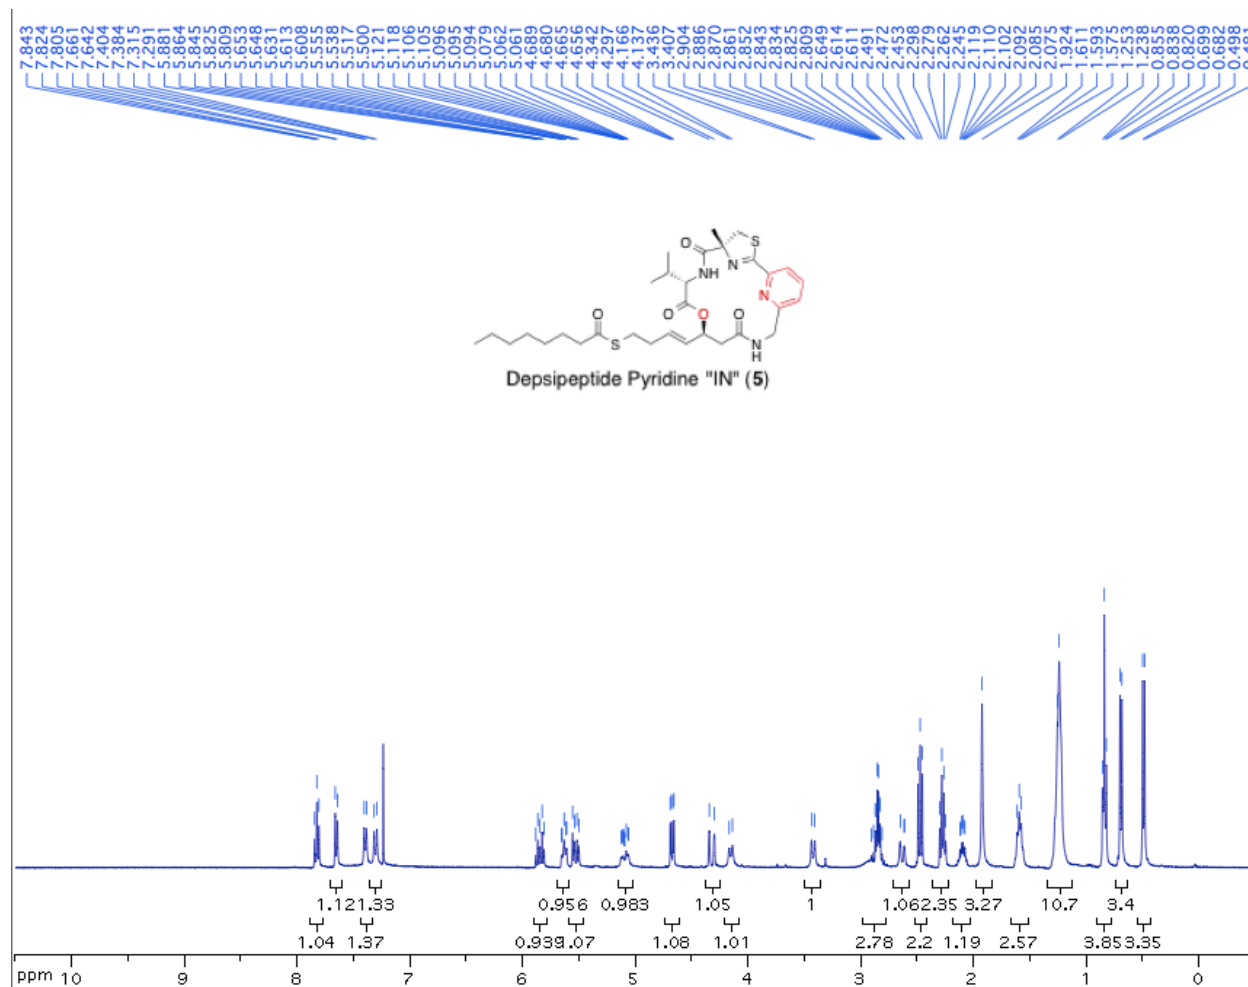

Figure S31. <sup>1</sup>H-NMR spectrum of depsipeptide pyridyl "IN" (5).

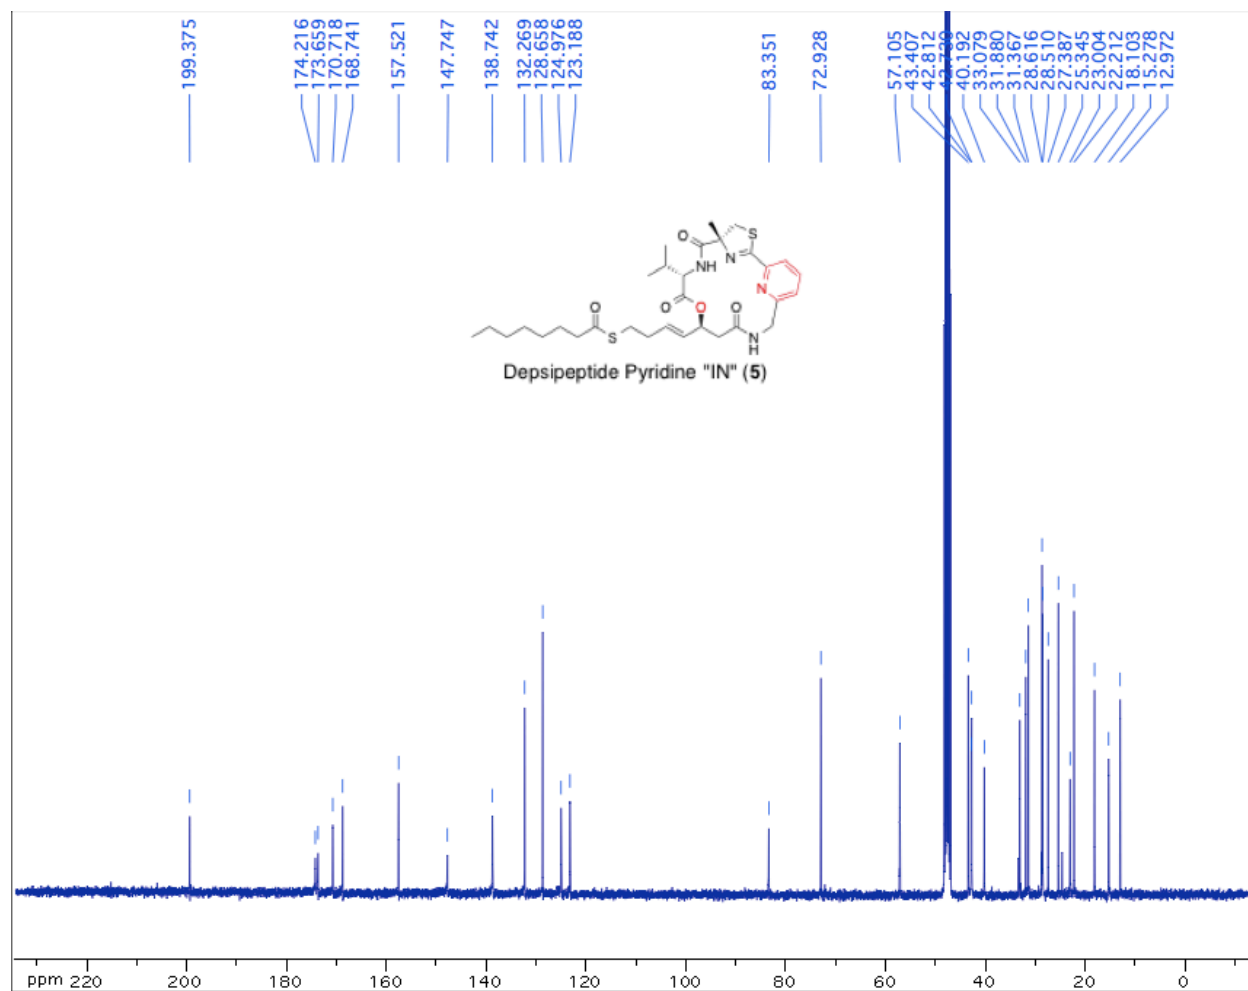

Figure S32.  $^{13}\text{C}$ -NMR spectrum of depsipeptide pyridyl "IN" (5).



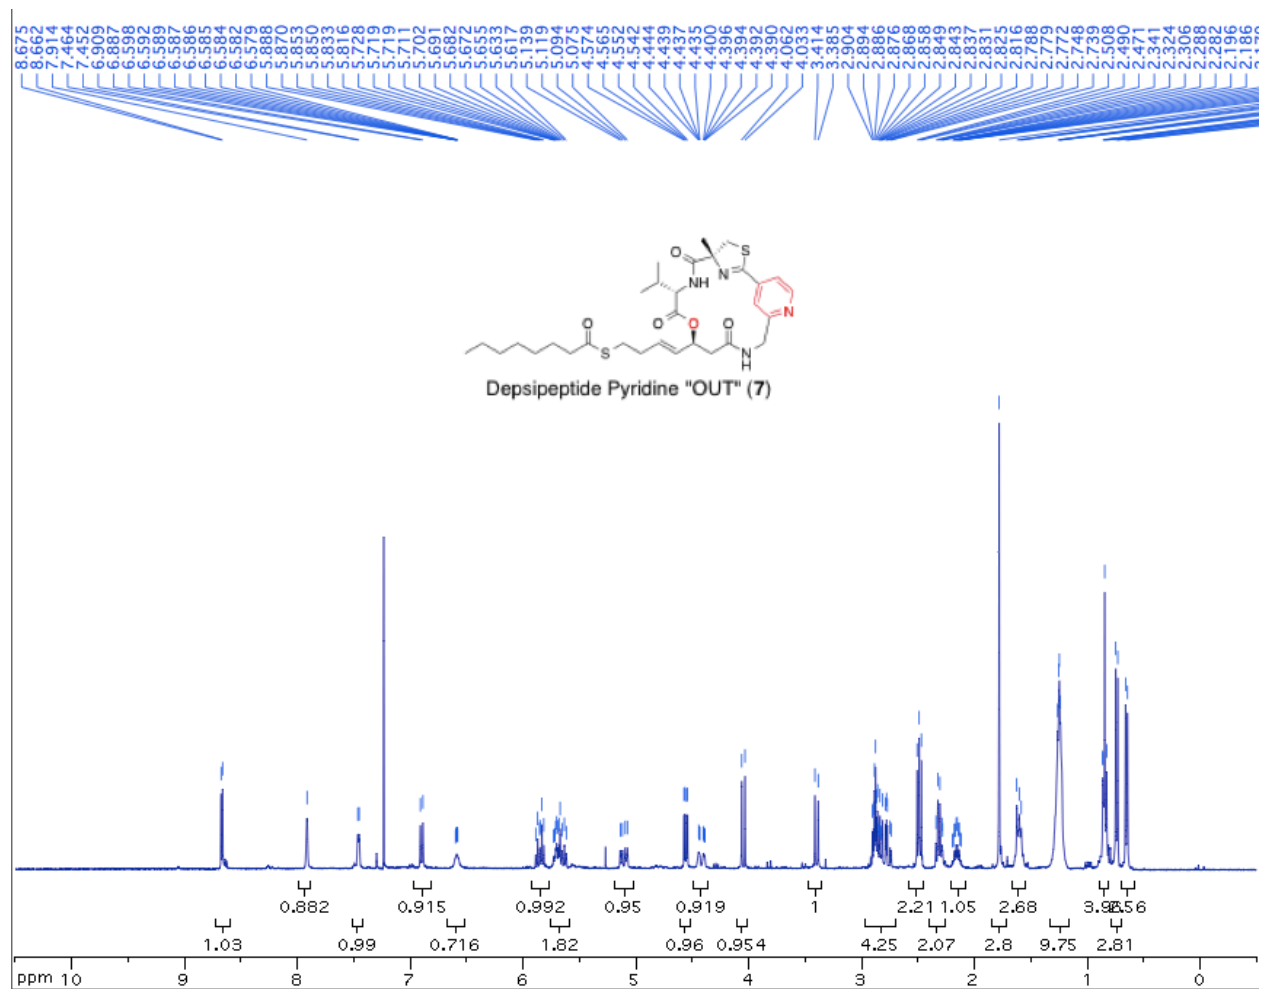

Figure S33. <sup>1</sup>H-NMR spectrum of depsipeptide pyridyl "OUT" (7).

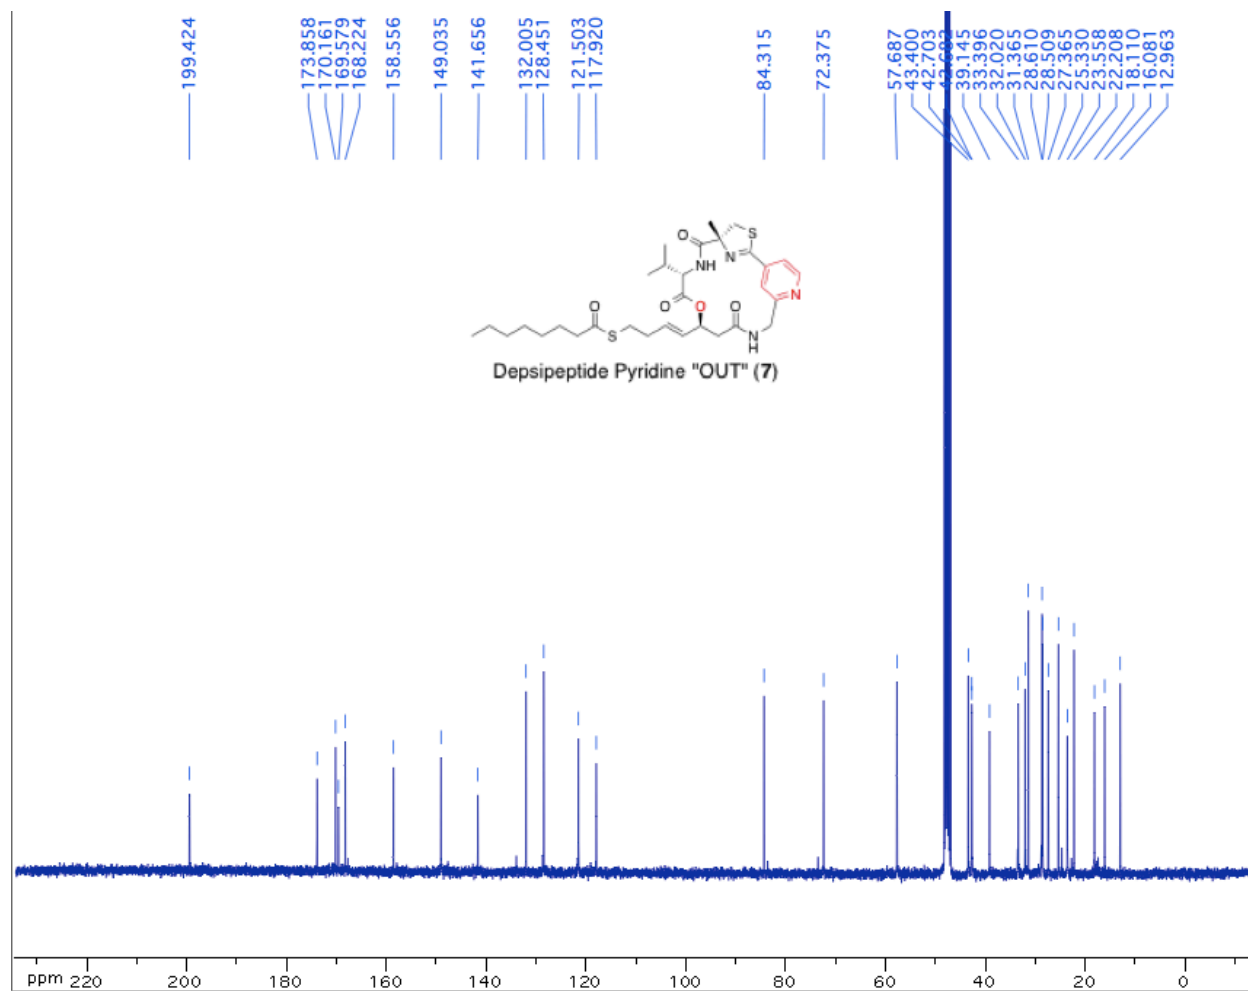

Figure S34.  $^{13}\text{C}$ -NMR spectrum of depsipeptide pyridyl "OUT" (7).

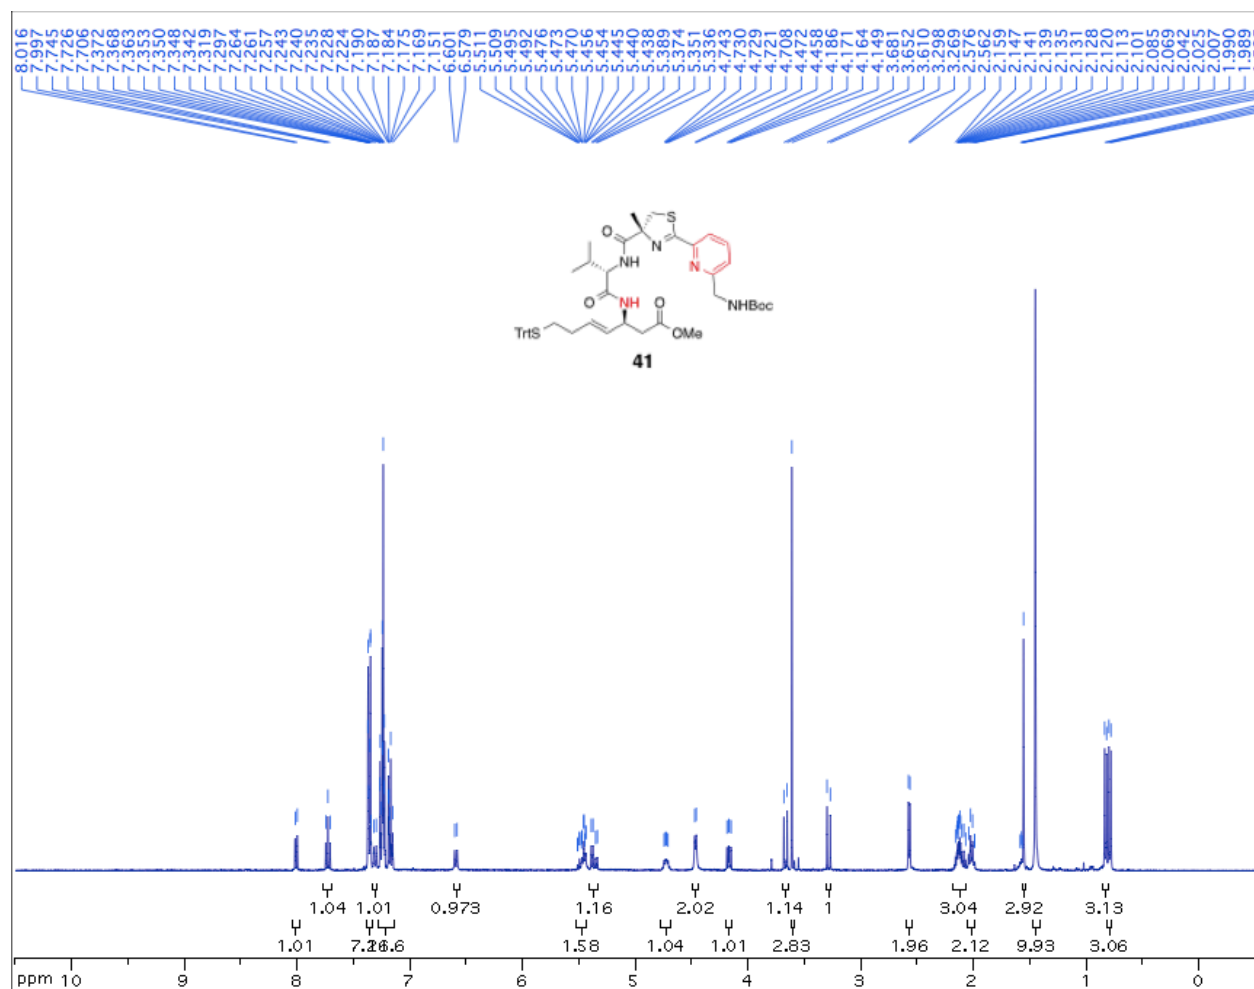

Figure S35. <sup>1</sup>H-NMR spectrum of (*S,E*)-Methyl 3-((*S*)-2-((*R*)-2-(6-(((*tert*-butoxycarbonyl)amino)methyl)pyridin-2-yl)-4-methyl-4,5-dihydrothiazole-4-carboxamido)-3-methylbutanamido)-7-(tritylthio)hept-4-enoate (**41**).

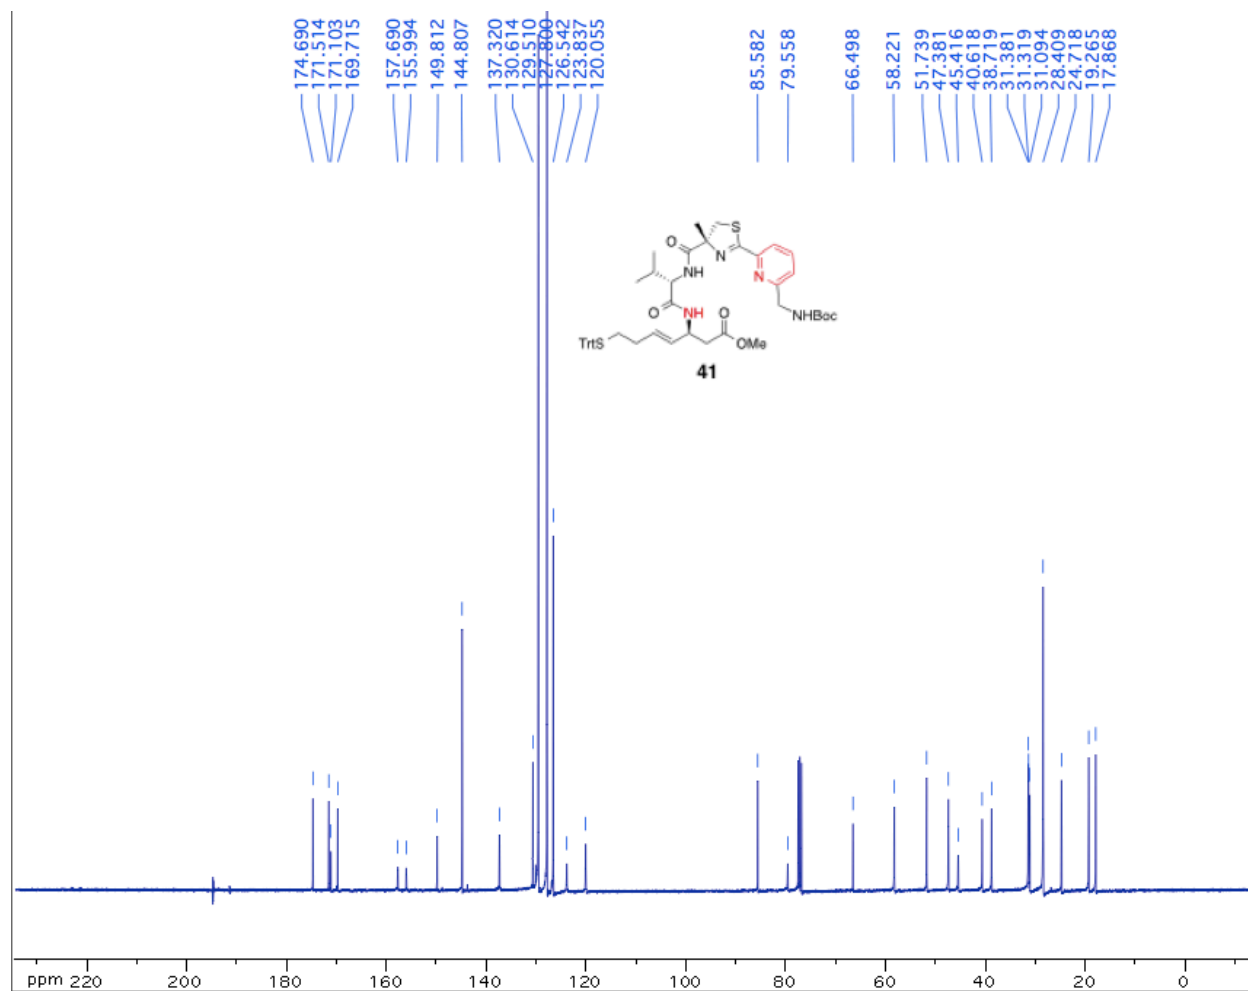

Figure S36. <sup>13</sup>C-NMR spectrum of (*S,E*)-Methyl 3-((*S*)-2-((*R*)-2-(6-(((*tert*-butoxycarbonyl)amino)methyl)pyridin-2-yl)-4-methyl-4,5-dihydrothiazole-4-carboxamido)-3-methylbutanamido)-7-(tritylthio)hept-4-enoate (**41**).



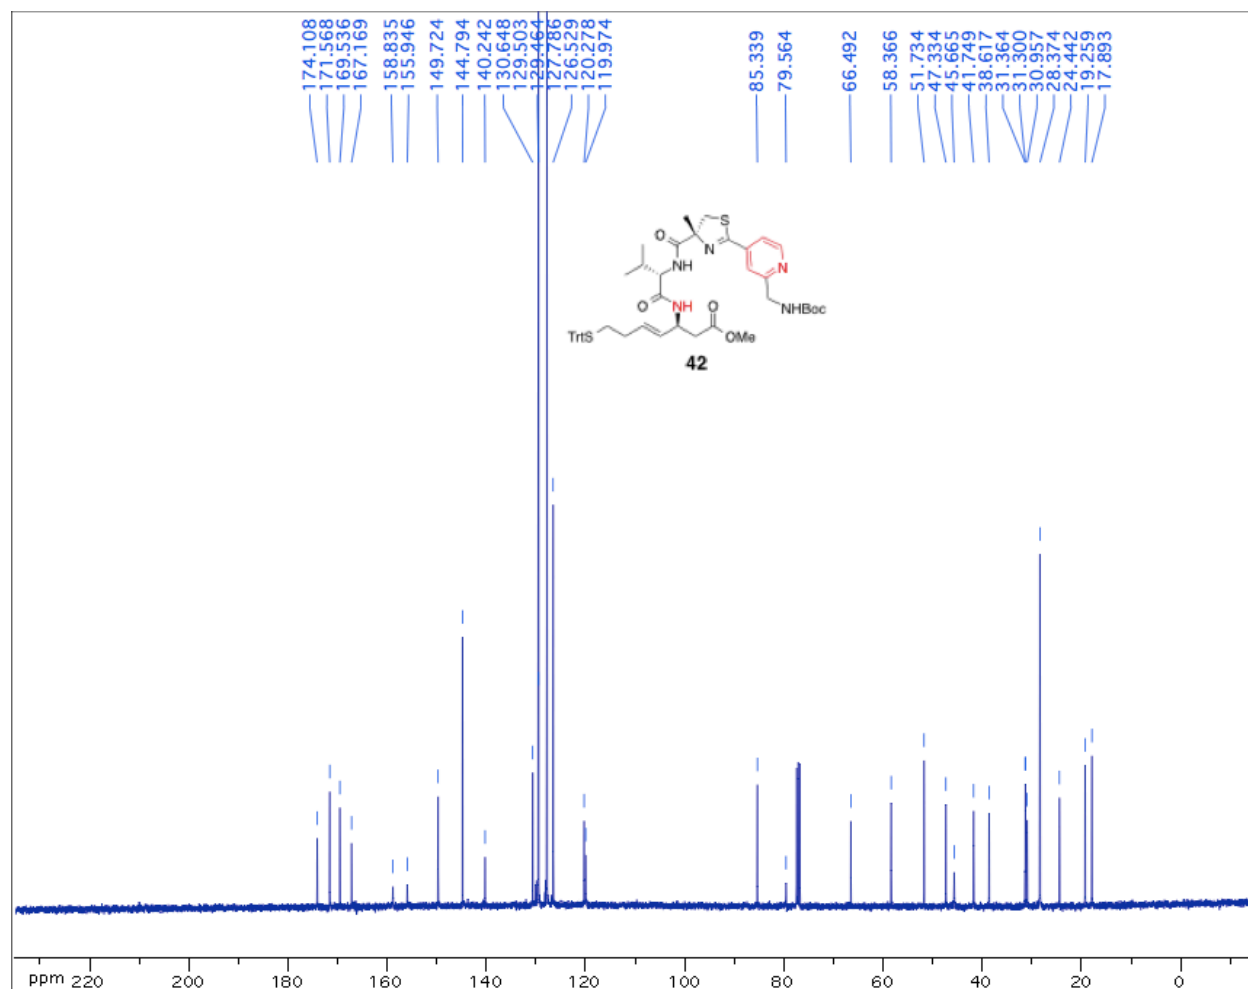

Figure S38.  $^{13}\text{C}$ -NMR spectrum of (*S,E*)-Methyl 3-((*S*)-2-((*R*)-2-(2-(((*tert*-butoxycarbonyl)amino)methyl)pyridin-4-yl)-4-methyl-4,5-dihydrothiazole-4-carboxamido)-3-methylbutanamido)-7-(tritylthio)hept-4-enoate (**42**).

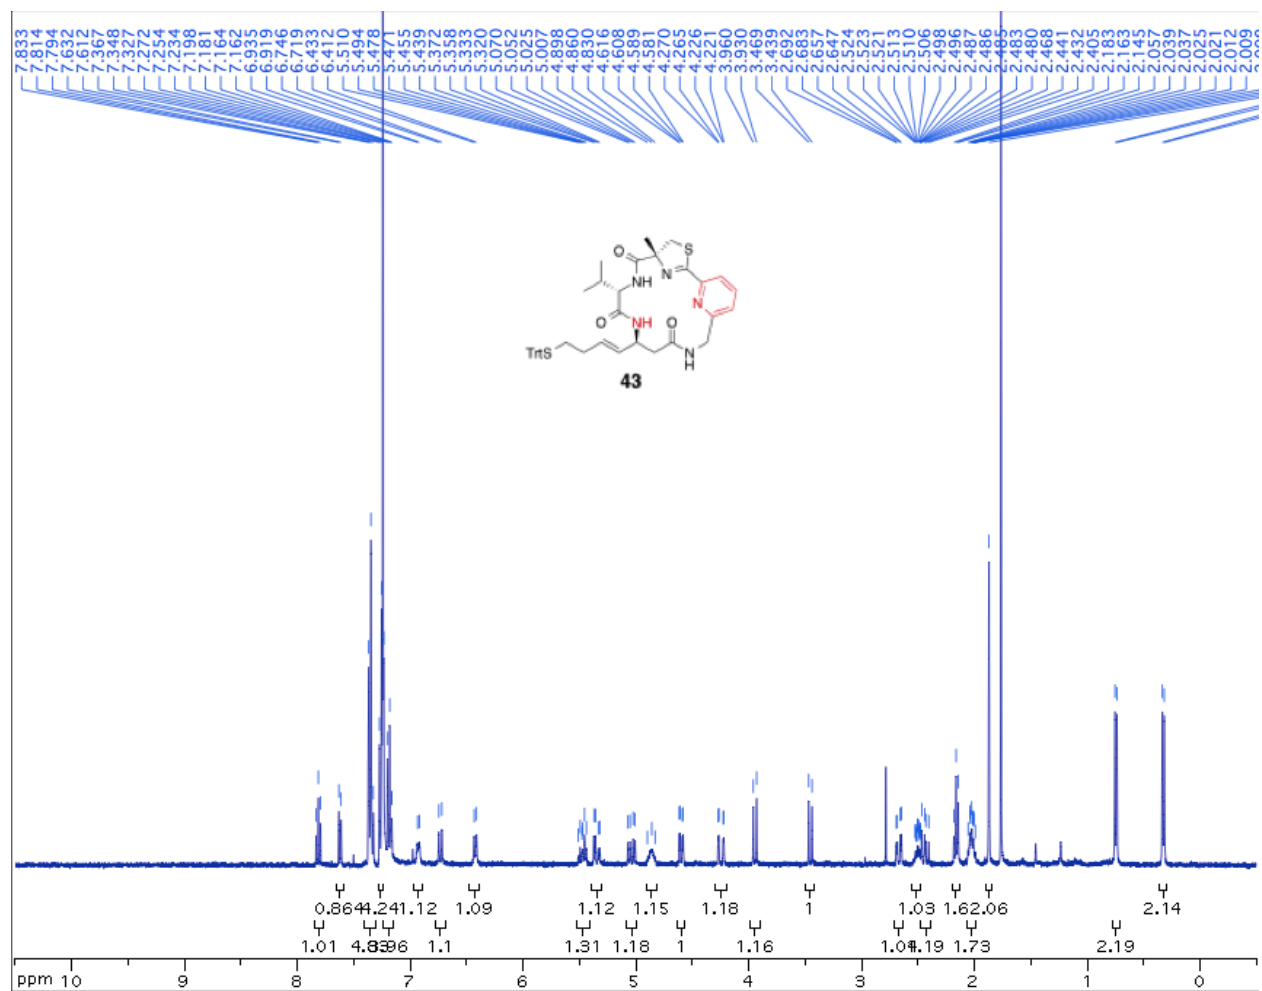

Figure S39. <sup>1</sup>H-NMR spectrum of trityl protected peptide isostere pyridyl “IN” macrocycle (**43**).

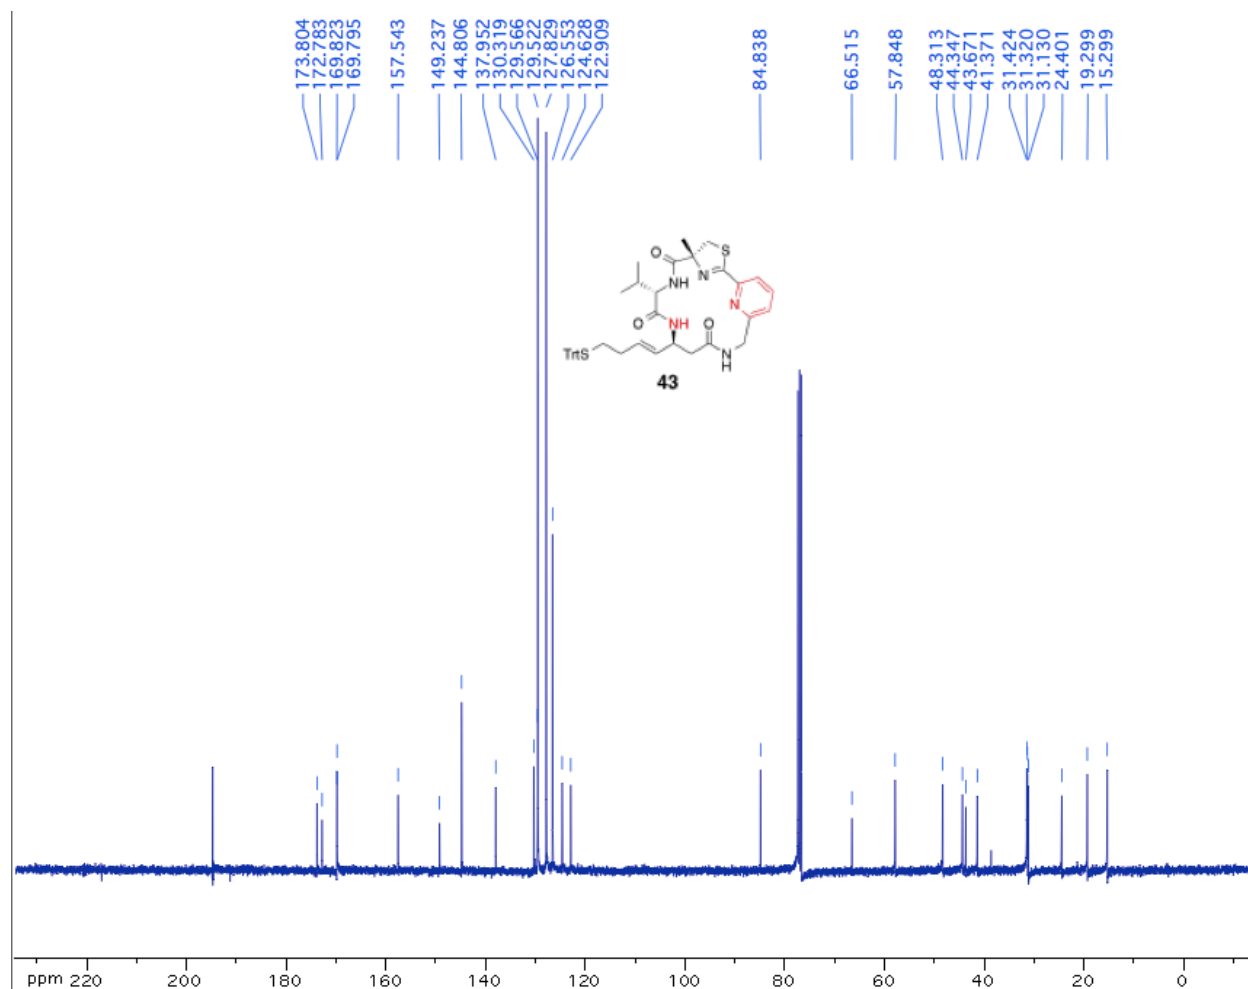

Figure S40.  $^{13}\text{C}$ -NMR spectrum of trityl protected peptide isostere pyridyl “IN” macrocycle (**43**).





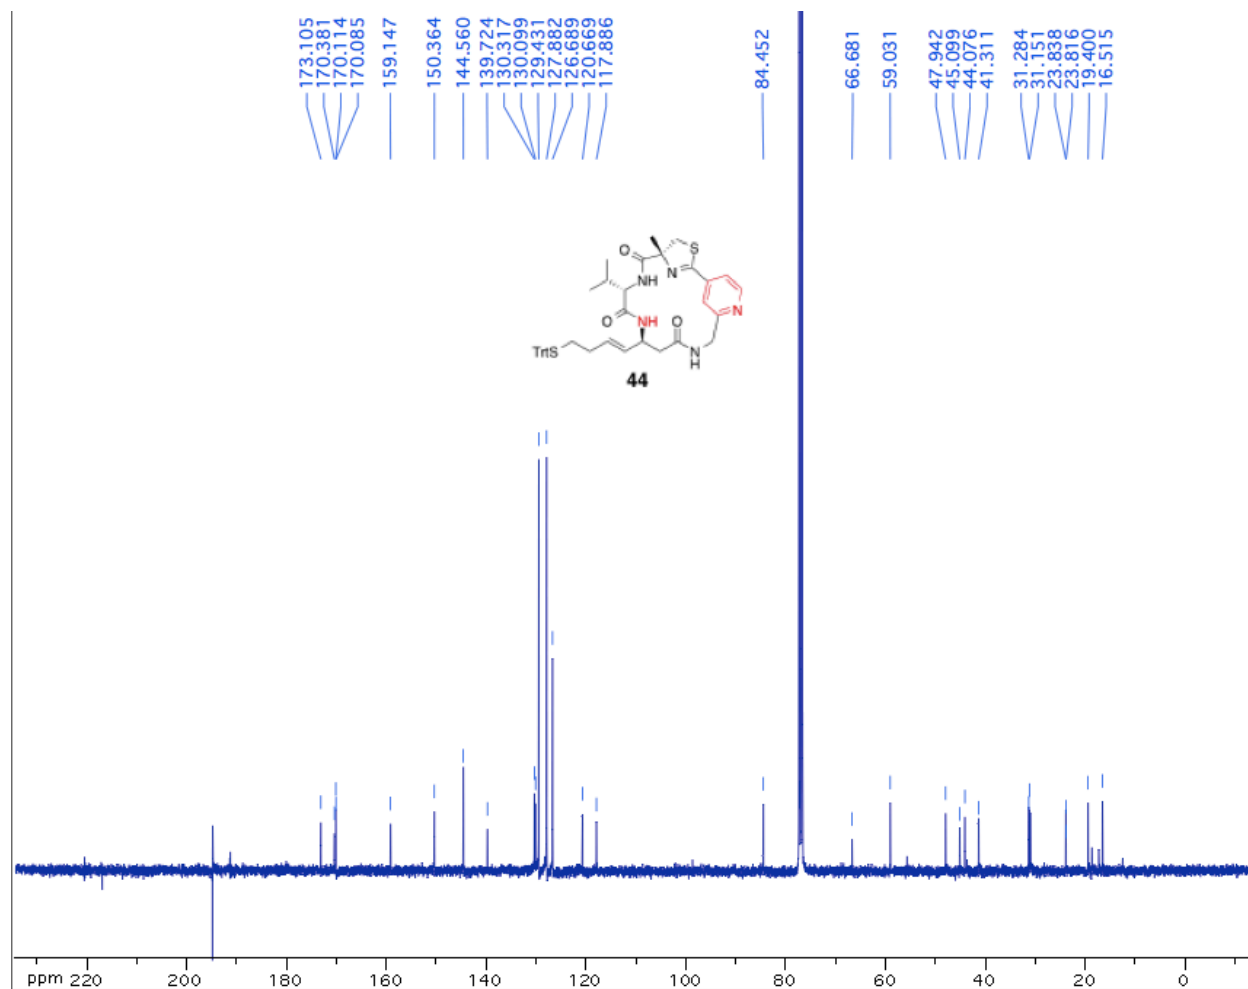

Figure S42.  $^{13}\text{C}$ -NMR spectrum of trityl protected peptide isostere pyridyl “OUT” macrocycle (**44**).

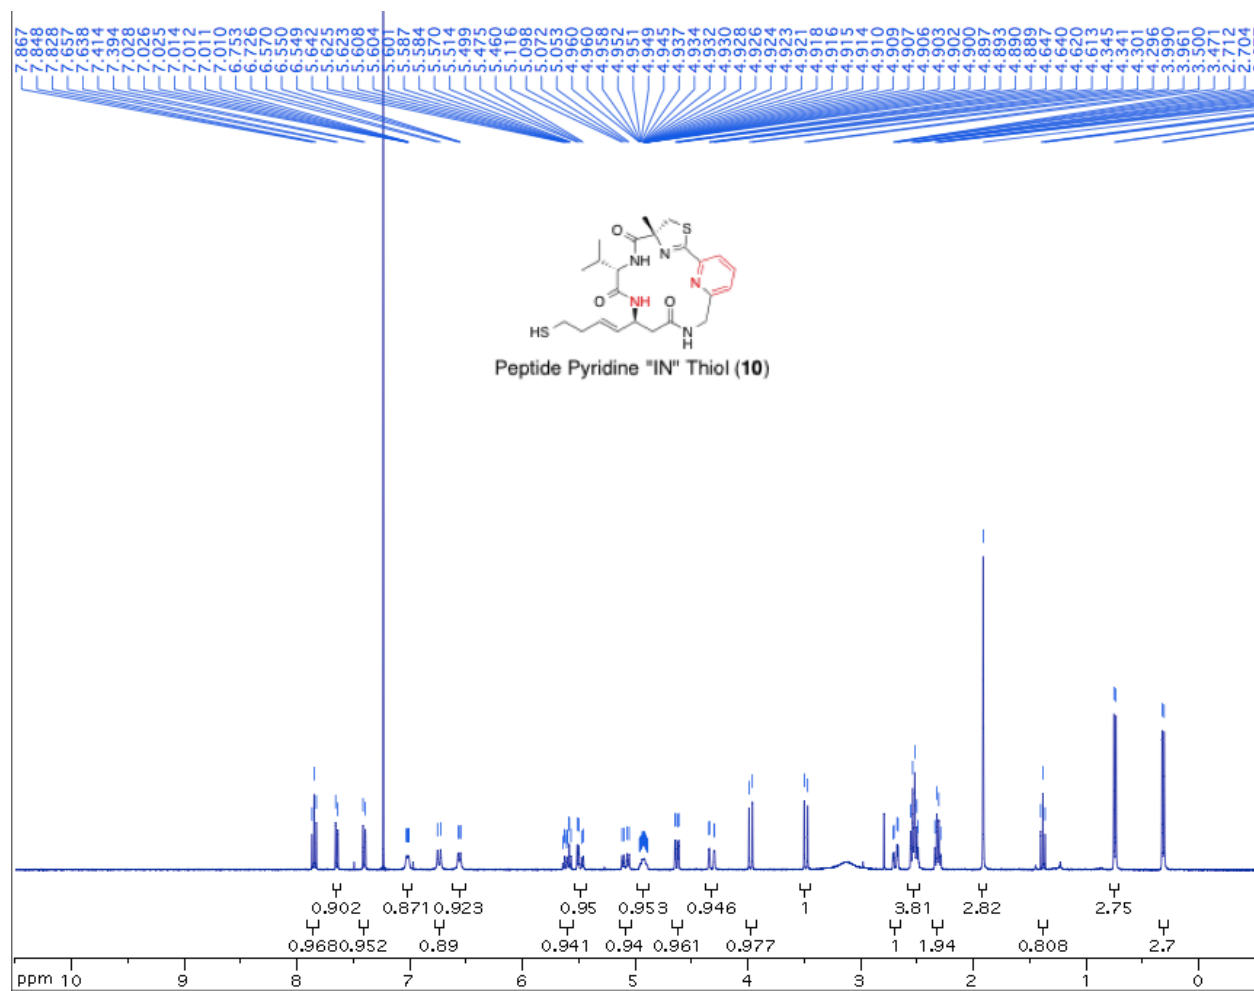

Figure S43.  $^1\text{H-NMR}$  spectrum of peptide isostere pyridyl "IN" thiol (10).

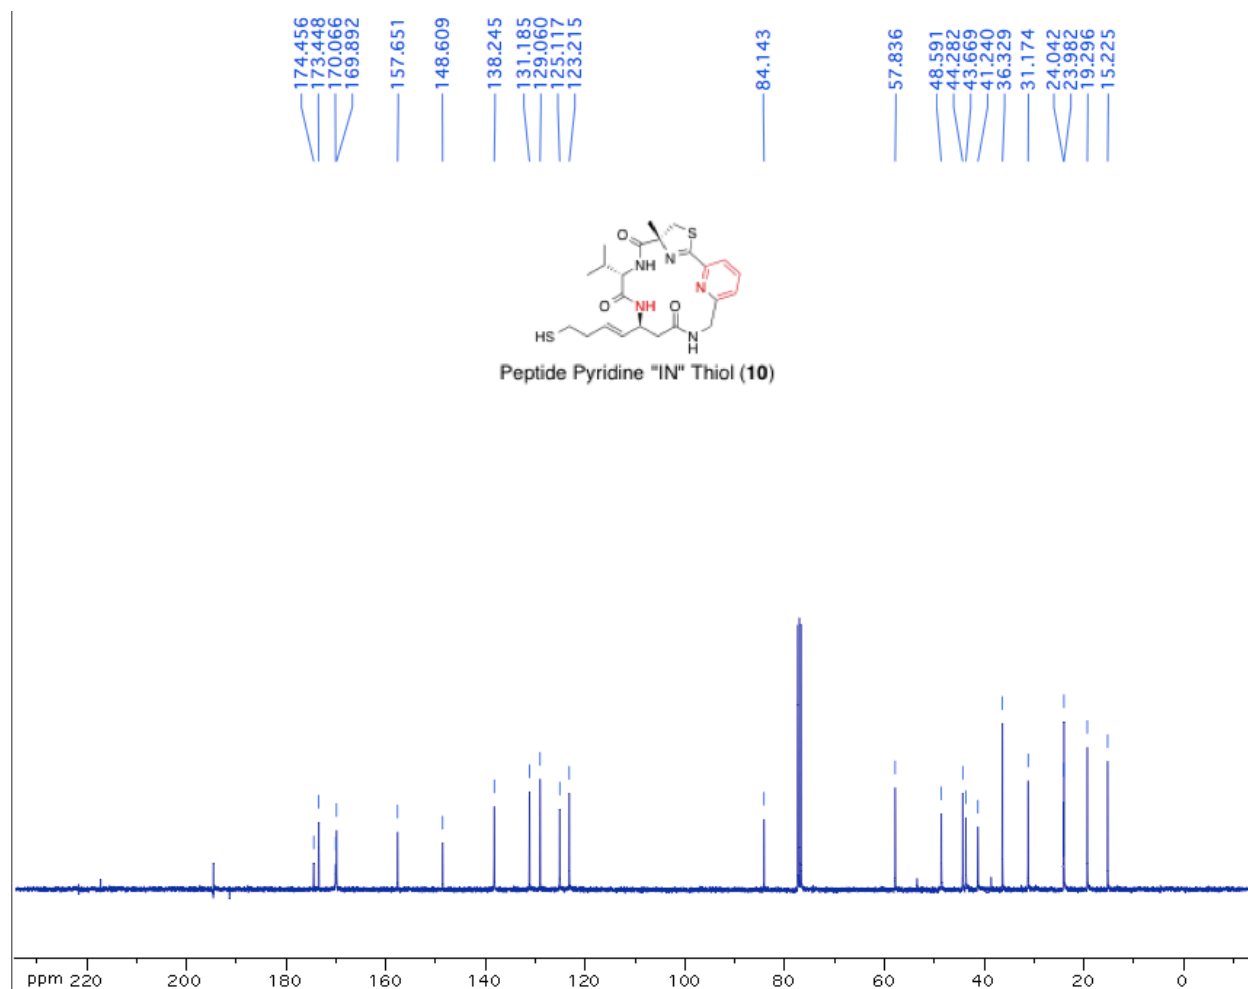

Figure S44. <sup>13</sup>C-NMR spectrum of peptide isostere pyridyl "IN" thiol (10).

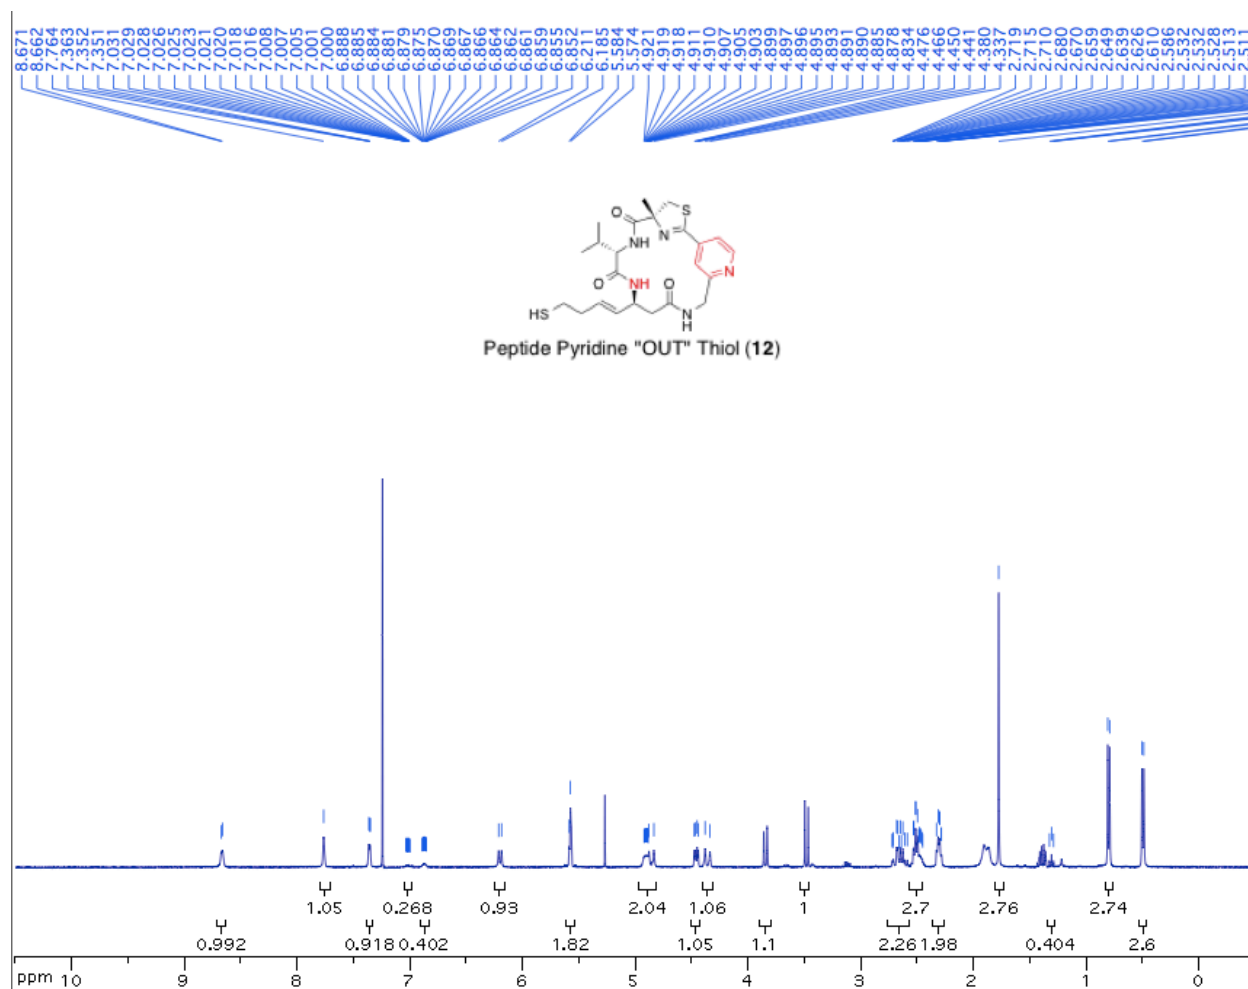

Figure S45. <sup>1</sup>H-NMR spectrum of peptide isostere pyridyl "OUT" thiol (12).

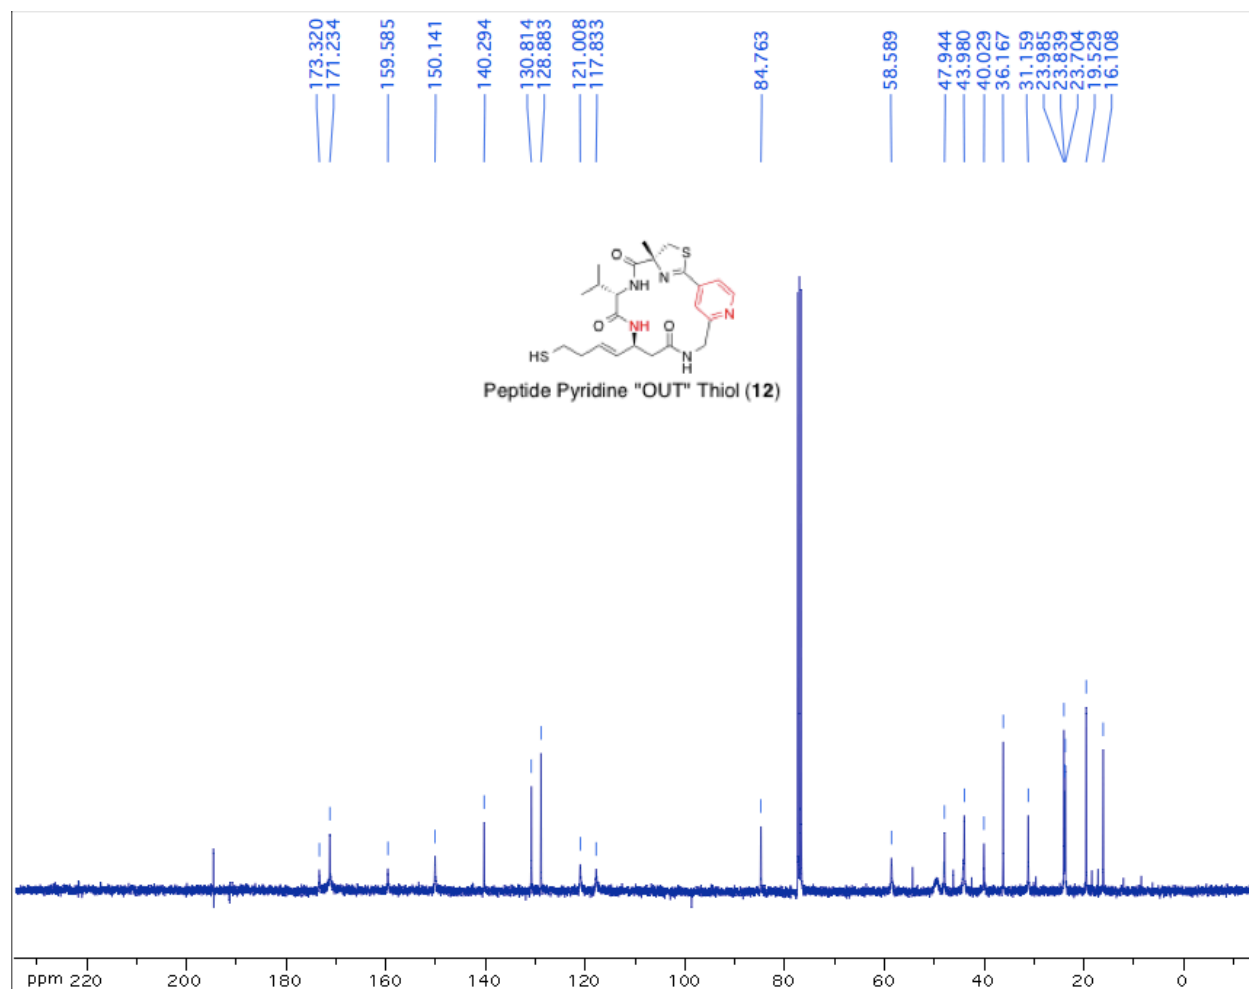

Figure S46. <sup>13</sup>C-NMR spectrum of peptide isostere pyridyl "OUT" thiol (12).



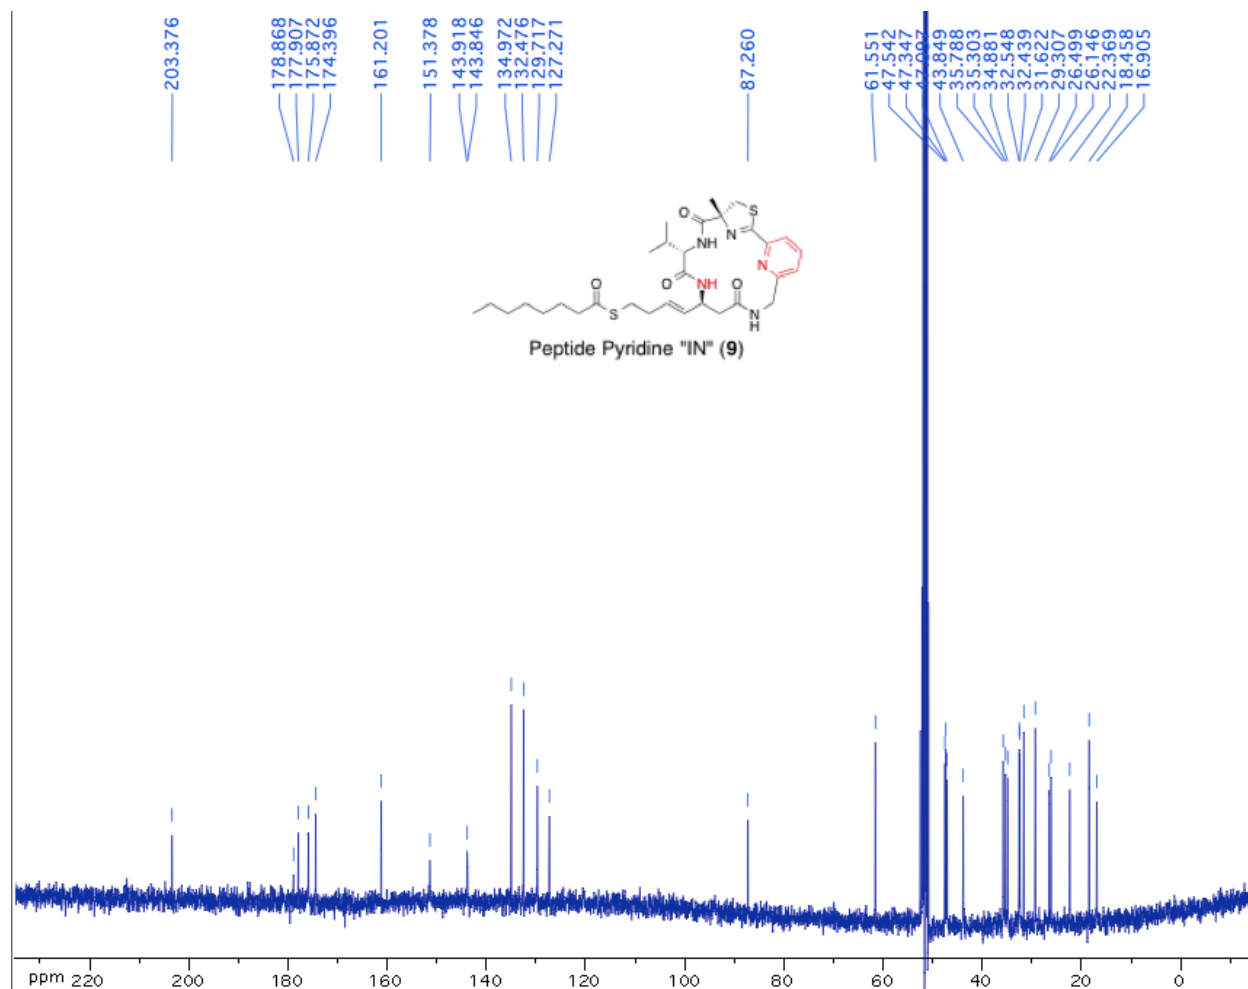

Figure S48.  $^{13}\text{C}$ -NMR spectrum of peptide isostere pyridyl "IN" (9).





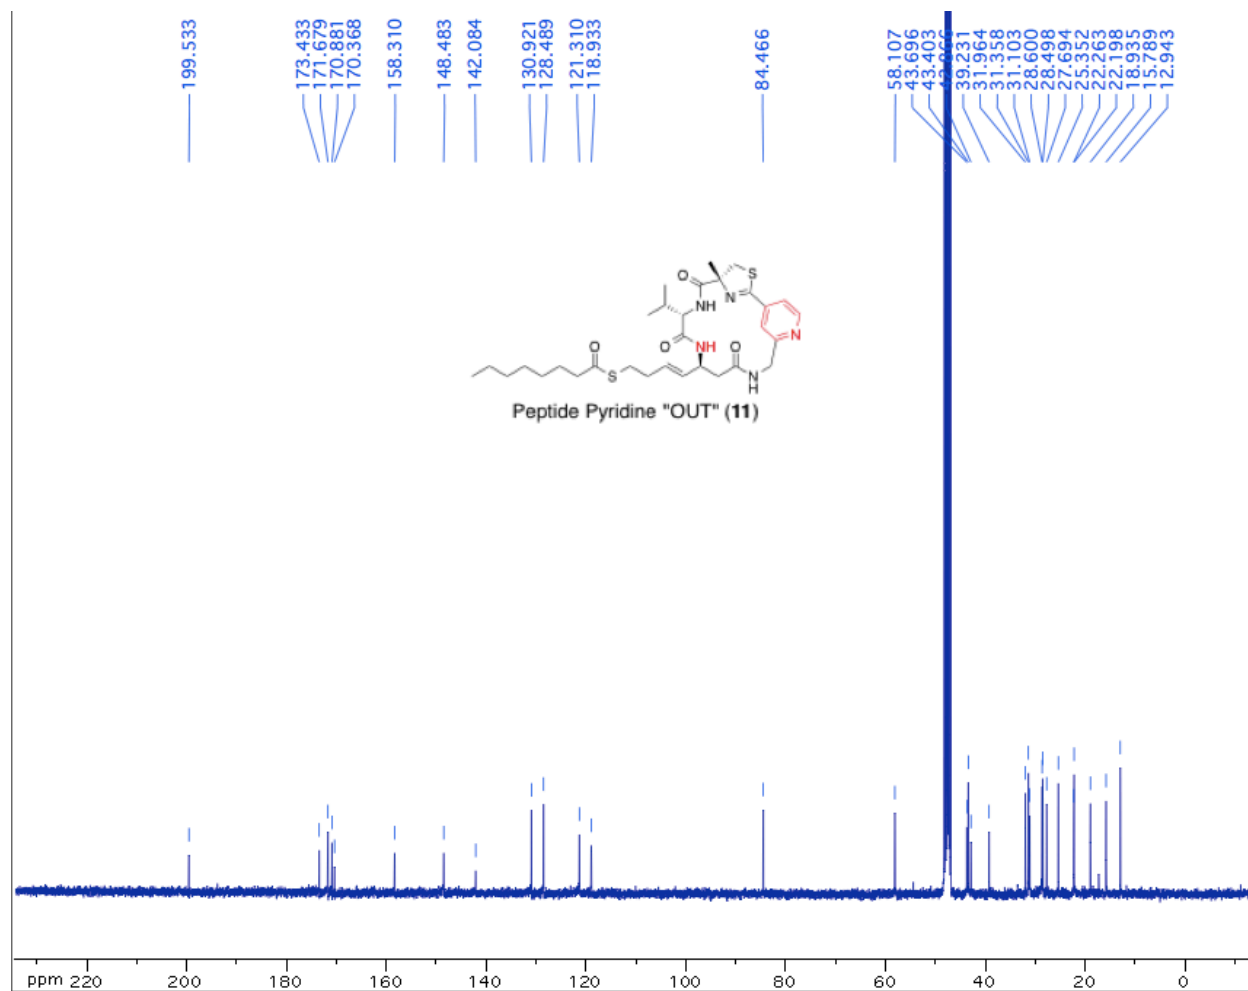

Figure S50.  $^{13}\text{C}$ -NMR spectrum of peptide isostere pyridyl "OUT" (11).
